# Supplementary material for: Iron catalyzed C–C dehydrogenative coupling reaction: synthesis of arylquinones from quinones/hydroquinones
Source: Royal Society of Chemistry journal article supplement (doi:10.1039/d1ra08828a), 2022-01-01

## **Iron catalyzed C-C dehydrogenative coupling reaction: synthesis of Arylquinones from Quinones/Hydroquinones**

Yu Dong,<sup>\*a</sup> Chun Xie,<sup>a</sup> Jia Chen,<sup>a</sup> Ai Shen,<sup>a</sup> Qi-Qi Luo,<sup>a</sup> Bing He,<sup>a</sup> Zhi-Fan Wang,<sup>a</sup>  
Bo Chang,<sup>a</sup> Fan Yang,<sup>a</sup> and Zhi-Chuan Shi,<sup>b</sup>

<sup>a</sup> College of Chemistry and Life Science, Institute of Functional Molecules, Chengdu Normal University, Chengdu, 611130, PR China.

<sup>b</sup> Southwest Minzu University, Chengdu 610041, P. R. China.

### **Table of Content**

|                                                                                      |            |
|--------------------------------------------------------------------------------------|------------|
| <b>1. General information</b> .....                                                  | <b>S2</b>  |
| <b>2. General procedure for the synthesis of compounds</b> .....                     | <b>S2</b>  |
| <b>3. Optimization of reaction conditions</b> .....                                  | <b>S3</b>  |
| <b>4. Procedure for gram-scale reaction</b> .....                                    | <b>S5</b>  |
| <b>5. Characterization data of products</b> .....                                    | <b>S6</b>  |
| <b>6. References</b> .....                                                           | <b>S12</b> |
| <b>7. Copies of <sup>1</sup>H and <sup>13</sup>C spectra for all compounds</b> ..... | <b>S13</b> |

## 1. General information

Chemicals and analytical grade solvents were purchased from commercial suppliers and used without further purification unless otherwise stated. All reagents were weighed and handled in air at room temperature. Analytical thin-layer chromatography was performed on glass plates of Silica Gel GF-254 with detection by UV light (254 and 365 nm). Column chromatography was carried out on silica gel (200-300 mesh).  $^1\text{H}$  NMR spectra were recorded at 400 MHz and  $^{13}\text{C}$  NMR spectra were recorded at 101 MHz by using Agilent 400 MHz NMR spectrometer. Chemical shifts were calibrated using residual undeuterated solvent as an internal reference ( $^1\text{H}$  NMR:  $\text{CDCl}_3$  7.26 ppm,  $\text{DMSO-}d_6$  2.50 ppm,  $^{13}\text{C}$  NMR:  $\text{CDCl}_3$  77.16 ppm,  $\text{DMSO-}d_6$  39.52 ppm). Data are reported as follows: chemical shift, multiplicity (s = singlet, br s = broad singlet, d = doublet, t = triplet, q = quartet, m = multiplet), Coupling constants ( $J$ ) were reported in Hertz (Hz). HRMS were performed on a Thermo Scientific LTQ Orbitrap XL instrument. Melting points were measured with micro melting point apparatus.

## 2. General procedure for the synthesis of the compounds

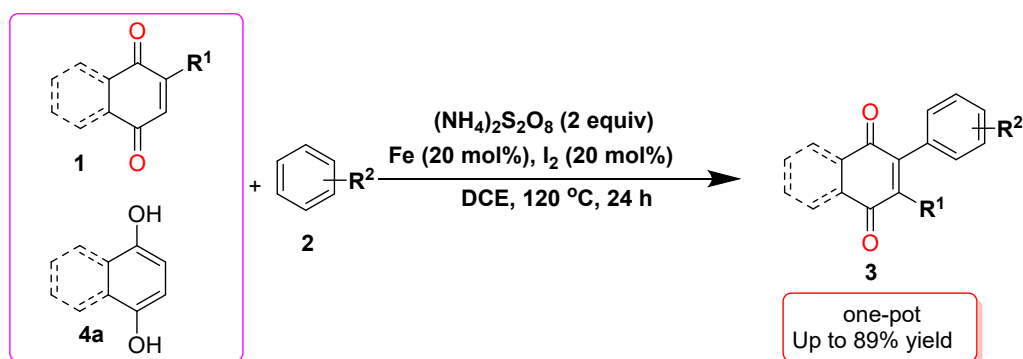

To a solution of  $\text{DCE}$  (2 mL) was added **1** or **4a** (0.3 mmol), **2** (0.8 mmol),  $\text{Fe}$  (0.06 mmol, 20 mol%),  $\text{I}_2$  (0.06 mmol, 20 mol%), and  $(\text{NH}_4)_2\text{S}_2\text{O}_8$  (0.6 mmol, 2 equiv). The reaction mixture was stirred at  $120\text{ }^\circ\text{C}$  for 24 h. After the completion of the reaction (monitored by TLC). The reaction was quenched with saturated salt water (2 ml) and the mixture was extracted with  $\text{EtOAc}$  ( $3 \times 3\text{ mL}$ ). The organic extracts were washed with brine, dried over  $\text{Na}_2\text{SO}_4$ , filtered and the solvent was removed in vacuo. The crude product was purified by silica gel column chromatography to give **3**.

### 3 Optimization of reaction conditions

Table S1 Optimization of catalyst and additive <sup>a</sup>

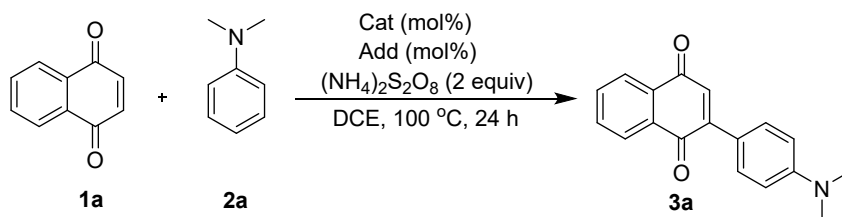

| Entry | [Cat] (mol%)                                | Additive (mol%)           | Yield <sup>b</sup> (%) |
|-------|---------------------------------------------|---------------------------|------------------------|
| 1     | CuI (10)                                    | —                         | 30                     |
| 2     | Cu(OAc) <sub>2</sub> (10)                   | —                         | Trace                  |
| 3     | Cu(OAc) <sub>2</sub> ·H <sub>2</sub> O (10) | —                         | Trace                  |
| 4     | CuCl <sub>2</sub> ·2H <sub>2</sub> O (10)   | —                         | 21                     |
| 5     | Cu(acac) <sub>2</sub> (10)                  | —                         | Trace                  |
| 6     | Zn (10)                                     | —                         | 41                     |
| 7     | Fe (10)                                     | —                         | 58                     |
| 8     | CoCl <sub>2</sub> (10)                      | —                         | 24                     |
| 9     | Pd(OTf) <sub>2</sub> (10)                   | —                         | 41                     |
| 10    | Pd(OAc) <sub>2</sub> (10)                   | —                         | 34                     |
| 11    | FeCl <sub>3</sub> (10)                      | —                         | 35                     |
| 12    | FeSO <sub>4</sub> ·7H <sub>2</sub> O (10)   | —                         | 23                     |
| 13    | Fe (20)                                     | —                         | 65                     |
| 14    | Fe (30)                                     | —                         | 53                     |
| 15    | Fe (40)                                     | —                         | 45                     |
| 16    | Fe (20)                                     | CuBr (20)                 | 24                     |
| 17    | Fe (20)                                     | CuI (20)                  | 31                     |
| 18    | Fe (20)                                     | Pd(OTf) <sub>2</sub> (20) | 34                     |
| 19    | Fe (20)                                     | Zn (20)                   | 14                     |
| 20    | Fe (20)                                     | AgOAc (20)                | 20                     |
| 21    | Fe (20)                                     | CoCl <sub>2</sub> (20)    | 14                     |
| 22    | Fe (20)                                     | I <sub>2</sub> (20)       | 76                     |
| 23    | Fe (20)                                     | I <sub>2</sub> (10)       | 59                     |
| 24    | Fe (20)                                     | I <sub>2</sub> (30)       | 61                     |
| 25    | Fe (20)                                     | I <sub>2</sub> (40)       | 65                     |

<sup>a</sup> Reaction conditions: 1,4-naphthoquinone **1a** (0.30 mmol), *N,N*-dimethylaniline **2a** (2 equiv), catalysts (mol%), additive (mol%), (NH<sub>4</sub>)<sub>2</sub>S<sub>2</sub>O<sub>8</sub> (2 equiv), 1,2-dichloroethane (2 mL) as solvent, 120 °C, sealed tube for 24 h. <sup>b</sup> Isolated yields.

**Table S2 Optimization of oxidants <sup>a</sup>**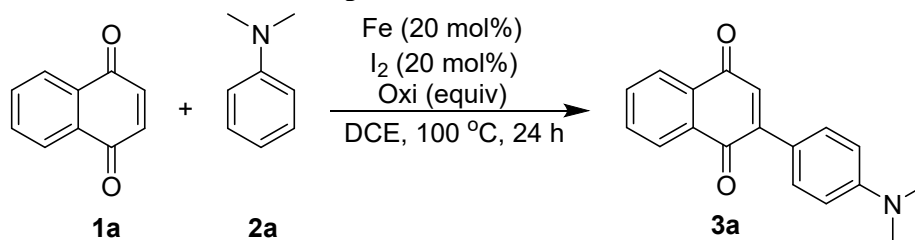

| Entry | Oxidants (equiv)                                                  | Yield <sup>b</sup> (%) |
|-------|-------------------------------------------------------------------|------------------------|
| 1     | —                                                                 | 37                     |
| 2     | K <sub>2</sub> S <sub>2</sub> O <sub>8</sub> (2)                  | 45                     |
| 3     | H <sub>2</sub> O <sub>2</sub> (2)                                 | Trace                  |
| 4     | KMnO <sub>4</sub> (2)                                             | 40                     |
| 5     | BPO (2)                                                           | 15                     |
| 6     | Oxone (2)                                                         | 32                     |
| 7     | (NH <sub>4</sub> ) <sub>2</sub> S <sub>2</sub> O <sub>8</sub> (2) | 76                     |
| 8     | (NH <sub>4</sub> ) <sub>2</sub> S <sub>2</sub> O <sub>8</sub> (1) | 68                     |
| 9     | (NH <sub>4</sub> ) <sub>2</sub> S <sub>2</sub> O <sub>8</sub> (3) | 66                     |

<sup>a</sup> Reaction conditions: 1,4- naphthoquinone **1a** (0.30 mmol), *N, N*-dimethylaniline **2a** (2 equiv), 1,2-dichloroethane (2 mL) as solvent, Fe (20 mol%), I<sub>2</sub> (20 mol%), oxidants (equiv), 120 °C, sealed tube for 24 h. <sup>b</sup> Isolated yields.<sup>c</sup>

**Table S3 Optimization of solvents <sup>a</sup>**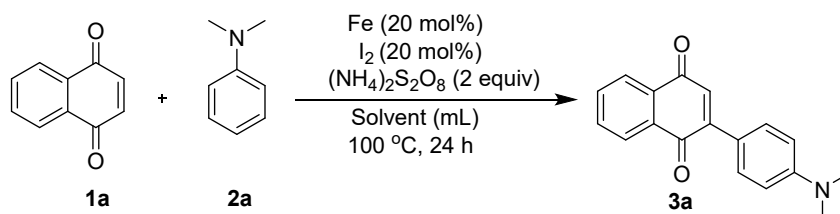

| Entry | Solvent (mL)           | yield <sup>b</sup> (%) |
|-------|------------------------|------------------------|
| 1     | DMF (2)                | Trace                  |
| 2     | CH <sub>3</sub> CN (2) | 45                     |
| 3     | EtOH (2)               | Trace                  |
| 4     | MeOH (2)               | Trace                  |
| 5     | 1,4-dioxane (2)        | 32                     |
| 6     | DCE (2)                | 76                     |
| 7     | DCE (1)                | 56                     |
| 8     | DCE (3)                | 68                     |

<sup>a</sup> Reaction conditions: 1,4- naphthoquinone **1a** (0.30 mmol), *N, N*-dimethylaniline **2a** (2 equiv), Fe (20 mmol%), I<sub>2</sub> (20 mol%), (NH<sub>4</sub>)<sub>2</sub>S<sub>2</sub>O<sub>8</sub> (2 equiv), solvent (mL), 120 °C, sealed tube for 24 h. <sup>b</sup> Isolated yields.

**Table S4 Optimization of dosages <sup>a</sup>**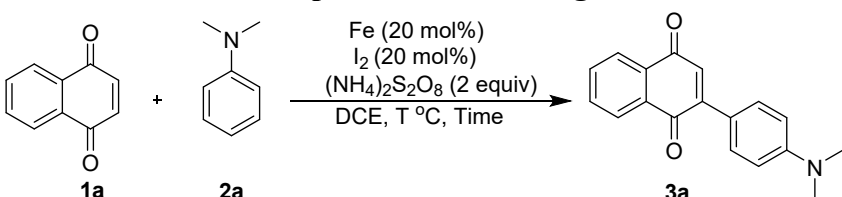

| Entry | 2a (equiv) | t (h) | T (°C) | Yield <sup>b</sup> (%) |
|-------|------------|-------|--------|------------------------|
| 1     | 1          | 24    | 100    | 26                     |
| 2     | 1.5        | 24    | 100    | 50                     |
| 3     | 2          | 24    | 100    | 76                     |
| 4     | 3          | 24    | 100    | 61                     |
| 5     | 2          | 24    | 80     | 41                     |
| 6     | 2          | 24    | 120    | 89                     |
| 7     | 2          | 24    | 140    | 70                     |
| 8     | 2          | 6     | 120    | 50                     |
| 9     | 2          | 18    | 120    | 64                     |
| 10    | 2          | 32    | 120    | 72                     |

<sup>a</sup> Reaction conditions: 1,4- naphthoquinone **1a** (0.30 mmol), *N,N*-dimethylaniline **2a** (equiv), 1,2-dichloroethane (2 mL) as solvent, Fe (20 mol%), I<sub>2</sub> (20 mol%), (NH<sub>4</sub>)<sub>2</sub>S<sub>2</sub>O<sub>8</sub> (2 equiv), T °C, sealed tube for time. <sup>b</sup> Isolated yields.

#### 4 Procedure for gram-scale reaction

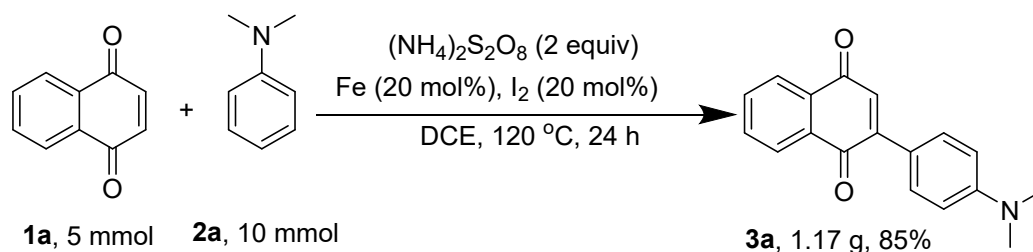

To a solution of DCE (32 mL) was added **1a** (5 mmol), **2** (10 mmol), Fe (20 mol%), I<sub>2</sub> (20 mol%), and (NH<sub>4</sub>)<sub>2</sub>S<sub>2</sub>O<sub>8</sub> (2 equiv). The reaction mixture was stirred at 120 °C for 24 h. After the completion of the reaction (monitored by TLC). The reaction was quenched with saturated salt water (30 ml) and the mixture was extracted with EtOAc (3 × 30 mL). The organic extracts were washed with brine, dried over Na<sub>2</sub>SO<sub>4</sub>, filtered and the solvent was removed in vacuo. The crude product was purified by silica gel column chromatography to give **3a** in 85% yield.

## 5 Characterization data of products

### 2-(4-(dimethylamino)phenyl)naphthalene-1,4-dione (3a) <sup>1</sup>

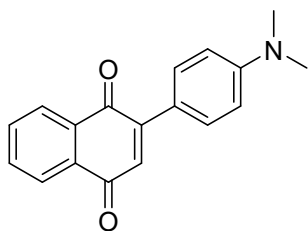

Purple solid, 89% yield; mp 96-98 °C. <sup>1</sup>H NMR (400 MHz, CDCl<sub>3</sub>) δ 8.18 (dd, *J* = 5.6, 3.4 Hz, 1H), 8.11 (dd, *J* = 5.6, 3.3 Hz, 1H), 7.75 (dt, *J* = 7.4, 3.6 Hz, 2H), 7.62 (d, *J* = 8.8 Hz, 2H), 7.04 (s, 1H), 6.79 (d, *J* = 8.7 Hz, 2H), 3.07 (s, 6H). <sup>13</sup>C NMR (101 MHz, CDCl<sub>3</sub>) δ 185.40, 185.17, 151.80, 147.37, 133.50, 133.34, 132.91, 132.31, 131.21, 130.96, 126.88, 125.67, 111.85, 40.19.

### 2-(4-(diethylamino)phenyl)naphthalene-1,4-dione (3b)

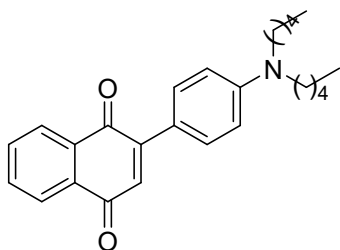

Purple solid, 85% yield; mp 96-98 °C. <sup>1</sup>H NMR (400 MHz, CDCl<sub>3</sub>) δ 8.18 – 8.13 (m, 1H), 8.09 (d, *J* = 2.9 Hz, 1H), 7.77 – 7.70 (m, 2H), 7.59 (d, *J* = 8.5 Hz, 2H), 7.01 (s, 1H), 6.68 (d, *J* = 7.4 Hz, 2H), 3.33 (t, *J* = 7.4 Hz, 4H), 1.61 (s, 5H), 1.37 (d, *J* = 13.4 Hz, 8H), 0.93 (t, *J* = 6.8 Hz, 5H). <sup>13</sup>C NMR (101 MHz, CDCl<sub>3</sub>) δ 185.63, 185.16, 149.71, 147.26, 133.46, 133.24, 132.97, 132.38, 131.20, 130.37, 126.86, 125.63, 111.21, 77.31, 77.00, 76.68, 50.99, 29.68, 29.26, 26.94, 22.56, 14.07. For C<sub>26</sub>H<sub>32</sub>NO<sub>2</sub><sup>+</sup> (M+H)<sup>+</sup> 390.2433 found: 390.2437.

### 2-(4-(dibenzylamino)phenyl)naphthalene-1,4-dione (3c) <sup>1</sup>

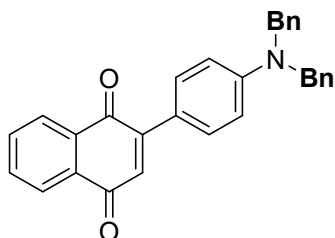

Purple solid, 82% yield; mp 144-146 °C. <sup>1</sup>H NMR (400 MHz, CDCl<sub>3</sub>) δ 8.19 – 8.13 (m, 1H), 8.10 (dd, *J* = 5.1, 3.4 Hz, 1H), 7.73 (dd, *J* = 5.2, 3.3 Hz, 2H), 7.54 (d, *J* = 8.6 Hz, 2H), 7.36 (t, *J* = 7.3 Hz, 4H), 7.28 (dd, *J* = 15.0, 7.0 Hz, 7H), 7.00 (s, 1H), 6.82 (d, *J* = 8.6 Hz, 2H), 4.74 (s, 4H). <sup>13</sup>C NMR (101 MHz, CDCl<sub>3</sub>) δ 185.39, 185.16, 150.82,

147.23, 137.61, 133.55, 133.39, 132.85, 132.29, 131.40, 131.17, 128.83, 128.56, 128.00, 127.21, 126.91, 126.51, 125.70, 121.26, 112.09, 111.19, 54.03.

### 2-(4-(diallylamino)phenyl)naphthalene-1,4-dione (3d)

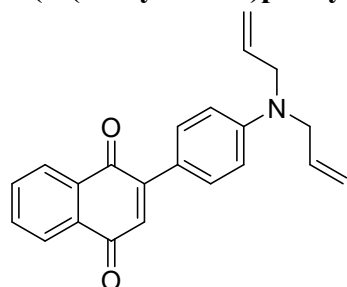

Purple solid, 75% yield; mp 96-98 °C.  $^1\text{H}$  NMR (400 MHz,  $\text{CDCl}_3$ )  $\delta$  8.15 (d,  $J = 3.6$  Hz, 1H), 8.09 (s, 1H), 7.77 – 7.71 (m, 2H), 7.56 (d,  $J = 8.4$  Hz, 2H), 7.01 (s, 1H), 6.75 (d,  $J = 8.0$  Hz, 2H), 5.93 – 5.81 (m, 2H), 5.23 – 5.15 (m, 4H), 3.99 (s, 4H).  $^{13}\text{C}$  NMR (101 MHz,  $\text{CDCl}_3$ )  $\delta$  185.45, 185.19, 150.29, 147.31, 133.50, 133.33, 132.94, 132.31, 131.13, 131.00, 126.89, 125.67, 120.70, 118.75, 116.40, 111.87, 52.61, 29.68. For  $\text{C}_{22}\text{H}_{20}\text{NO}_2^+$  (M+H) $^+$  330.1494 found: 330.1497.

### 2-(4-(ethyl(methyl)amino)phenyl)naphthalene-1,4-dione (3e)

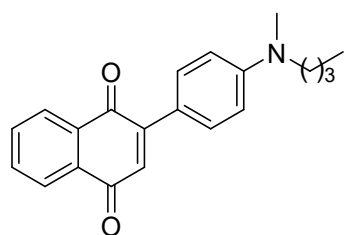

Purple solid, 78% yield; mp 96-98 °C.  $^1\text{H}$  NMR (400 MHz,  $\text{CDCl}_3$ )  $\delta$  8.18 – 8.14 (m, 1H), 8.12 – 8.06 (m, 1H), 7.73 (dd,  $J = 5.2, 3.2$  Hz, 2H), 7.60 (d,  $J = 8.7$  Hz, 2H), 7.02 (s, 1H), 6.73 (d,  $J = 8.2$  Hz, 2H), 3.39 (t,  $J = 7.4$  Hz, 2H), 3.02 (s, 3H), 1.63 – 1.58 (m, 2H), 1.37 (dd,  $J = 14.9, 7.4$  Hz, 2H), 0.96 (t,  $J = 7.3$  Hz, 3H).  $^{13}\text{C}$  NMR (101 MHz,  $\text{CDCl}_3$ )  $\delta$  185.50, 185.17, 147.32, 133.48, 133.29, 132.94, 132.34, 131.09, 130.78, 126.87, 125.65, 111.47, 52.22, 38.41, 29.00, 20.29, 13.95. For  $\text{C}_{21}\text{H}_{22}\text{NO}_2^+$  (M+H) $^+$  320.1651 found: 320.1656.

### 2-(4-(ethyl(methyl)amino)phenyl)naphthalene-1,4-dione (3f) <sup>1</sup>

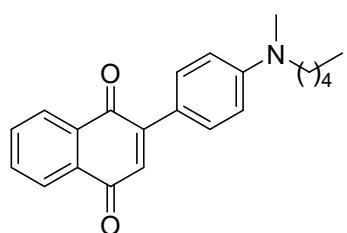

Purple sticky solid, 76% yield; mp 96-98 °C.  $^1\text{H}$  NMR (400 MHz,  $\text{CDCl}_3$ )  $\delta$  8.19 – 8.12 (m, 1H), 8.11 – 8.04 (m, 1H), 7.73 (dd,  $J = 5.5, 3.3$  Hz, 2H), 7.60 (d,  $J = 8.8$  Hz, 2H), 7.02 (s, 1H), 6.73 (d,  $J = 8.2$  Hz, 2H), 3.38 (t,  $J = 7.5$  Hz, 2H), 3.02 (s, 3H), 1.61 (d,  $J = 6.8$  Hz, 3H), 1.37 – 1.30 (m, 3H), 0.92 (t,  $J = 6.8$  Hz, 3H).  $^{13}\text{C}$  NMR (101 MHz,

CDCl<sub>3</sub>)  $\delta$  185.61, 185.17, 133.48, 133.29, 132.94, 132.34, 131.09, 130.77, 126.87, 125.65, 111.43, 51.69, 37.81, 29.24, 26.54, 22.56, 14.05.

### 2-(4-(ethyl(methyl)amino)phenyl)naphthalene-1,4-dione (3g)

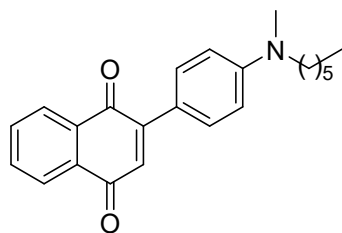

Purple solid, 76% yield; mp 96-98 °C. <sup>1</sup>H NMR (400 MHz, CDCl<sub>3</sub>)  $\delta$  8.16 (dd, *J* = 5.4, 3.5 Hz, 1H), 8.09 (dd, *J* = 5.6, 3.3 Hz, 2H), 7.76 – 7.73 (m, 2H), 7.61 (s, 1H), 7.00 (d, *J* = 14.1 Hz, 2H), 6.72 (s, 1H), 3.40 – 3.35 (m, 2H), 3.02 (s, 3H), 1.61 (s, 4H), 1.32 (d, *J* = 2.5 Hz, 4H), 0.89 (d, *J* = 6.3 Hz, 3H). <sup>13</sup>C NMR (101 MHz, CDCl<sub>3</sub>)  $\delta$  185.22, 185.17, 147.32, 138.65, 133.90, 133.48, 133.29, 132.89, 132.34, 132.30, 131.83, 131.09, 130.77, 126.87, 126.39, 125.65, 111.04, 109.56, 52.20, 38.16, 31.66, 29.63, 26.75, 22.63, 14.01. For C<sub>23</sub>H<sub>26</sub>NO<sub>2</sub><sup>+</sup> (M+H)<sup>+</sup> 348.1964 found: 348.1967.

### 2-(4-((cyclohexylmethyl)(methyl)amino)phenyl)naphthalene-1,4-dione (3h)

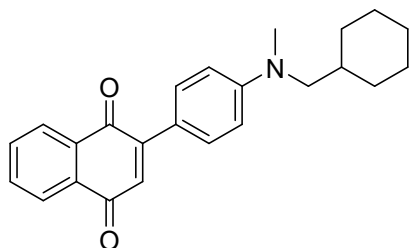

Purple solid, 70% yield; mp 96-98 °C. <sup>1</sup>H NMR (400 MHz, CDCl<sub>3</sub>)  $\delta$  8.18 – 8.13 (m, 1H), 8.12 – 8.05 (m, 1H), 7.77 – 7.69 (m, 2H), 7.59 (d, *J* = 9.0 Hz, 2H), 7.01 (s, 1H), 6.71 (d, *J* = 9.0 Hz, 2H), 3.21 (d, *J* = 6.9 Hz, 2H), 3.04 (s, 3H), 1.76 – 1.68 (m, 5H), 1.28 – 1.17 (m, 4H), 0.98 (t, *J* = 10.9 Hz, 2H). <sup>13</sup>C NMR (101 MHz, CDCl<sub>3</sub>)  $\delta$  185.57, 185.16, 150.90, 147.32, 133.46, 133.27, 132.95, 132.35, 131.03, 130.63, 126.87, 125.63, 119.78, 111.30, 59.24, 39.79, 36.84, 31.19, 29.60, 26.45, 25.93. For C<sub>24</sub>H<sub>26</sub>NO<sub>2</sub><sup>+</sup> (M+H)<sup>+</sup> 360.1964 found: 360.1965.

### 2-(4-(benzyl(methyl)amino)phenyl)naphthalene-1,4-dione (3i)

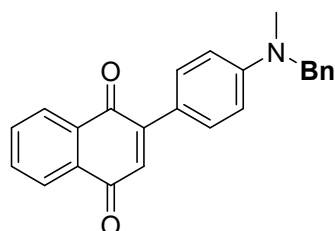

Purple solid, 72% yield; mp 96-98 °C. <sup>1</sup>H NMR (400 MHz, CDCl<sub>3</sub>)  $\delta$  8.16 (dd, *J* = 4.9, 3.4 Hz, 1H), 8.09 (dd, *J* = 4.8, 3.4 Hz, 1H), 7.73 (dd, *J* = 4.9, 3.2 Hz, 2H), 7.58 (d,



$J = 8.4$  Hz, 2H), 7.34 (t,  $J = 7.4$  Hz, 2H), 7.29 – 7.21 (m, 3H), 7.01 (s, 1H), 6.80 (d,  $J = 8.5$  Hz, 2H), 4.63 (s, 2H), 3.13 (s, 3H).  $^{13}\text{C}$  NMR (101 MHz,  $\text{CDCl}_3$ )  $\delta$  185.43, 185.16, 151.08, 147.29, 137.97, 133.52, 133.36, 132.88, 132.30, 131.21, 131.10, 128.73, 127.14, 126.89, 126.50, 125.68, 120.80, 111.76, 56.01, 38.62, 29.70. For  $\text{C}_{24}\text{H}_{20}\text{NO}_2^+$  ( $\text{M}+\text{H}$ ) $^+$  354.1494 found: 354.1495.

### 2-(4-(pyrrolidin-1-yl)phenyl)naphthalene-1,4-dione (3j) <sup>1</sup>

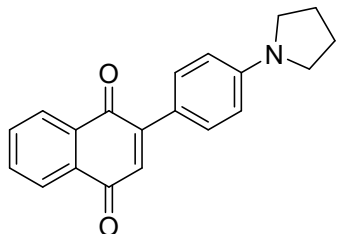

Purple solid, 86% yield; mp 193-195 °C.  $^1\text{H}$  NMR (400 MHz,  $\text{CDCl}_3$ )  $\delta$  8.16 (dd,  $J = 5.8, 3.1$  Hz, 1H), 8.09 (dd,  $J = 5.4, 3.5$  Hz, 1H), 7.73 (dd,  $J = 5.7, 3.3$  Hz, 2H), 7.61 (d,  $J = 8.8$  Hz, 2H), 7.01 (s, 1H), 6.61 (d,  $J = 8.8$  Hz, 2H), 3.37 (d,  $J = 6.3$  Hz, 4H), 2.05 (d,  $J = 6.4$  Hz, 4H).  $^{13}\text{C}$  NMR (101 MHz,  $\text{CDCl}_3$ )  $\delta$  185.62, 185.17, 149.28, 147.49, 133.45, 133.25, 132.98, 132.36, 131.11, 130.55, 126.86, 125.62, 119.83, 111.58, 47.55, 29.69, 25.46.

### 2-(4-(methylamino)phenyl)naphthalene-1,4-dione (3k) <sup>1</sup>

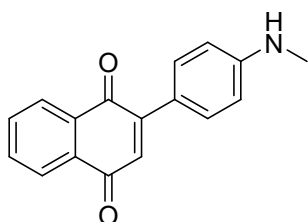

Purple solid, 73% yield; mp 135-137 °C.  $^1\text{H}$  NMR (400 MHz,  $\text{CDCl}_3$ )  $\delta$  8.15 (s, 1H), 8.09 (d,  $J = 1.9$  Hz, 1H), 7.75 – 7.71 (m, 2H), 7.54 (d,  $J = 8.3$  Hz, 2H), 7.00 (s, 1H), 6.65 (d,  $J = 8.3$  Hz, 2H), 2.89 (s, 3H).  $^{13}\text{C}$  NMR (101 MHz,  $\text{CDCl}_3$ )  $\delta$  185.39, 185.23, 151.03, 147.49, 133.53, 133.40, 132.85, 132.26, 131.45, 131.13, 126.89, 125.68, 121.64, 112.01, 30.31.

### 2-(4-(ethylamino)phenyl)naphthalene-1,4-dione (3l)

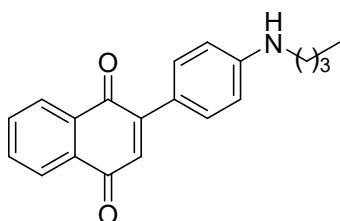

Purple solid, 71% yield; mp 96-98 °C.  $^1\text{H}$  NMR (400 MHz,  $\text{CDCl}_3$ )  $\delta$  8.16 (s, 1H), 8.09 (s, 1H), 7.76 – 7.70 (m, 2H), 7.53 (d,  $J = 8.2$  Hz, 2H), 7.01 (s, 1H), 6.66 (d,  $J = 7.9$  Hz, 2H), 3.19 (t,  $J = 6.9$  Hz, 2H), 1.64 (dt,  $J = 14.0, 6.9$  Hz, 2H), 1.53 – 1.33 (m,

1H), 0.95 (dd,  $J = 25.4, 18.2$  Hz, 2H).  $^{13}\text{C}$  NMR (101 MHz,  $\text{CDCl}_3$ )  $\delta$  185.40, 185.22, 150.08, 147.46, 133.52, 133.38, 132.86, 132.25, 131.34, 131.18, 126.89, 125.68, 112.34, 43.30, 31.41, 20.21, 13.83. For  $\text{C}_{20}\text{H}_{20}\text{NO}_2^+$  ( $\text{M}+\text{H}$ ) $^+$  306.1494 found: 306.1499.

### 2-(4-(dimethylamino)-2-methylphenyl)naphthalene-1,4-dione (3m) <sup>2</sup>

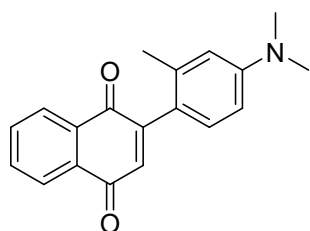

Purple solid, 69% yield; mp 158-159 °C.  $^1\text{H}$  NMR (400 MHz,  $\text{CDCl}_3$ )  $\delta$  8.18 – 8.11 (m, 2H), 7.75 (dd,  $J = 3.8, 2.6$  Hz, 2H), 7.10 (d,  $J = 9.1$  Hz, 1H), 6.90 (s, 1H), 6.62 (s, 2H), 3.00 (s, 6H), 2.23 (s, 3H).  $^{13}\text{C}$  NMR (101 MHz,  $\text{CDCl}_3$ )  $\delta$  185.37, 184.71, 151.14, 150.49, 137.52, 135.76, 133.57, 132.54, 132.26, 130.99, 126.98, 125.90, 114.09, 109.54, 40.30, 29.69, 21.33.

### 2-(1H-indol-3-yl)naphthalene-1,4-dione (3n) <sup>1</sup>

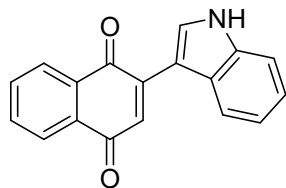

Red solid, 87% yield; mp 201-203 °C.  $^1\text{H}$  NMR (400 MHz,  $\text{DMSO}-d_6$ )  $\delta$  11.97 (s, 1H), 8.22 (t,  $J = 4.0$  Hz, 1H), 8.09 – 8.04 (m, 1H), 8.00 – 7.95 (m, 1H), 7.88 – 7.79 (m, 3H), 7.50 (dd,  $J = 6.3, 2.4$  Hz, 1H), 7.26 – 7.16 (m, 3H).  $^{13}\text{C}$  NMR (101 MHz,  $\text{DMSO}-d_6$ )  $\delta$  185.39, 184.49, 142.50, 137.16, 134.31, 133.83, 132.89, 132.13, 128.09, 126.89, 125.58, 125.54, 122.91, 121.62, 120.34, 112.99, 107.77.

### Methyl 3-(1,4-dioxo-1,4-dihydronaphthalen-2-yl)-1H-indole-2-carboxylate (3o)

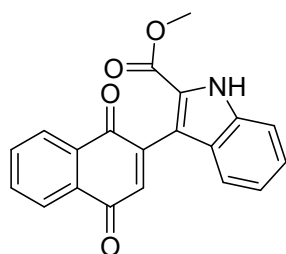

Purple solid, 62% yield; mp 96-98 °C.  $^1\text{H}$  NMR (400 MHz,  $\text{CDCl}_3$ )  $\delta$  9.39 (s, 1H), 8.18 (d,  $J = 2.9$  Hz, 2H), 7.81 – 7.77 (m, 2H), 7.63 (d,  $J = 8.2$  Hz, 1H), 7.48 (d,  $J = 8.2$  Hz, 1H), 7.37 (d,  $J = 7.9$  Hz, 1H), 7.17 (s, 1H), 3.76 (s, 3H).  $^{13}\text{C}$  NMR (101 MHz,  $\text{CDCl}_3$ )  $\delta$  185.01, 183.51, 161.36, 143.92, 136.14, 135.91, 133.78, 133.71, 132.72,

132.29, 126.99, 126.84, 126.13, 126.09, 125.87, 121.89, 120.49, 112.25, 52.11. For  $C_{20}H_{14}NO_4^+$  (M+H)<sup>+</sup> 332.0923 found: 332.0921.

### 2-(4-chloro-1*H*-indol-3-yl)naphthalene-1,4-dione (3p) <sup>3</sup>

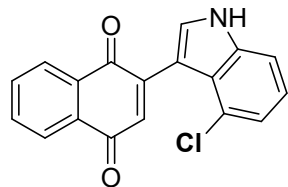

Red solid, 75% yield; mp 253-255 °C. <sup>1</sup>H NMR (400 MHz, DMSO-*d*<sub>6</sub>) δ 12.11 (s, 1H), 8.15 (ddd, *J* = 15.6, 5.5, 3.3 Hz, 2H), 7.99 (dd, *J* = 5.6, 3.3 Hz, 2H), 7.85 (d, *J* = 2.5 Hz, 1H), 7.57 (d, *J* = 8.0 Hz, 1H), 7.27 (t, *J* = 7.8 Hz, 1H), 7.19 (d, *J* = 7.6 Hz, 1H), 7.12 (s, 1H). <sup>13</sup>C NMR (101 MHz, DMSO-*d*<sub>6</sub>) δ 185.48, 184.77, 144.86, 138.36, 134.64, 134.57, 134.53, 132.54, 132.18, 129.80, 126.93, 125.97, 124.91, 123.93, 123.32, 121.35, 111.85, 109.07.

### 2-(5-methoxy-1*H*-indol-3-yl)naphthalene-1,4-dione (3q) <sup>3</sup>

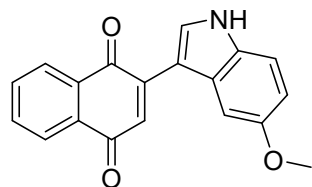

Black solid, 84% yield; mp 165-167 °C. <sup>1</sup>H NMR (400 MHz, DMSO-*d*<sub>6</sub>) δ 11.85 (s, 1H), 8.09 (d, *J* = 2.9 Hz, 1H), 8.00 – 7.96 (m, 1H), 7.92 – 7.88 (m, 1H), 7.77 – 7.74 (m, 2H), 7.35 (d, *J* = 8.8 Hz, 1H), 7.21 (d, *J* = 1.7 Hz, 1H), 7.11 (s, 1H), 6.81 (dd, *J* = 8.8, 2.1 Hz, 1H), 3.75 (s, 3H). <sup>13</sup>C NMR (101 MHz, DMSO-*d*<sub>6</sub>) δ 185.47, 184.49, 155.41, 142.61, 134.41, 133.90, 133.41, 132.87, 132.12, 127.56, 126.90, 126.20, 125.53, 113.71, 112.48, 107.63, 102.97, 55.91.

### 2-chloro-3-(4-(dimethylamino)phenyl)naphthalene-1,4-dione (3r) <sup>4</sup>

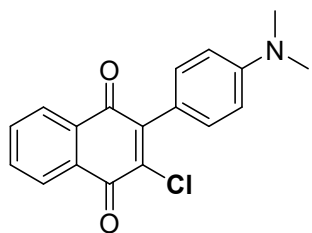

Purple solid, 63% yield; mp 201-202 °C. <sup>1</sup>H NMR (400 MHz, CDCl<sub>3</sub>) δ 8.13 (dd, *J* = 22.1, 2.9 Hz, 2H), 7.73 (d, *J* = 3.0 Hz, 1H), 7.59 (s, 1H), 7.37 (d, *J* = 8.6 Hz, 1H), 7.02 (s, 1H), 6.76 (d, *J* = 8.6 Hz, 2H), 3.05 (s, 6H). <sup>13</sup>C NMR (101 MHz, CDCl<sub>3</sub>) δ 185.42, 185.19, 147.35, 134.00, 133.83, 133.50, 133.35, 132.91, 132.31, 131.90, 131.16, 130.95, 127.24, 126.89, 125.67, 111.75, 110.93, 40.14.

### 2-(4-(dimethylamino)phenyl)anthracene-1,4-dione (3s)

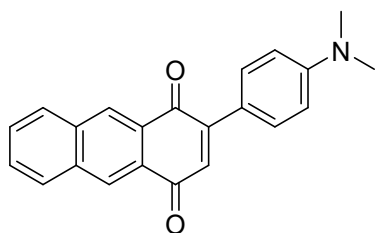

Purple solid, 83% yield; mp 96-98 °C.  $^1\text{H}$  NMR (400 MHz,  $\text{CDCl}_3$ )  $\delta$  8.65 (s, 1H), 8.58 (s, 1H), 8.03 (s, 2H), 7.64 (d,  $J = 6.2$  Hz, 4H), 7.10 (s, 1H), 6.75 (d,  $J = 7.6$  Hz, 2H), 3.03 (s, 6H).  $^{13}\text{C}$  NMR (101 MHz,  $\text{CDCl}_3$ )  $\delta$  184.95, 184.77, 151.69, 148.59, 134.78, 132.82, 131.01, 130.10, 130.00, 129.58, 129.20, 129.06, 128.99, 127.64, 120.76, 111.69, 40.10, 29.70. For  $\text{C}_{22}\text{H}_{18}\text{NO}_2^+$  ( $\text{M}+\text{H}$ ) $^+$  328.1338 found: 328.1341.

## 6 References

- 1 J. H. Jiang, S. S. K. Boominathan, W. P. Hu, C. Y. Chen, J. K. Vandavasi, Y. T. Lin and J. J. Wang, *Eur. J. Org. Chem.*, 2016, **2016**, 2284-2289.
- 2 M. Janeczko, O. M. Demchuk, D. Strzelecka, K. Kubiński and M. Masłyk, *Eur. J. Org. Chem.*, 2016, **124**, 1019-1025.
- 3 Y. Dong, H. Zhang, J. Yang, S. He, Z.-C. Shi, X.-M. Zhang and J.-Y. Wang, *ACS omega.*, 2019, **4**, 21567-21577.
- 4 C. Blackburn, J. Griffiths, *J. Chem. Res.*, 1982, **12**, 3457-3472.

## 7 Copies of $^1\text{H}$ and $^{13}\text{C}$ spectra for all compounds

### 2-(4-(dimethylamino)phenyl)naphthalene-1,4-dione (3a)

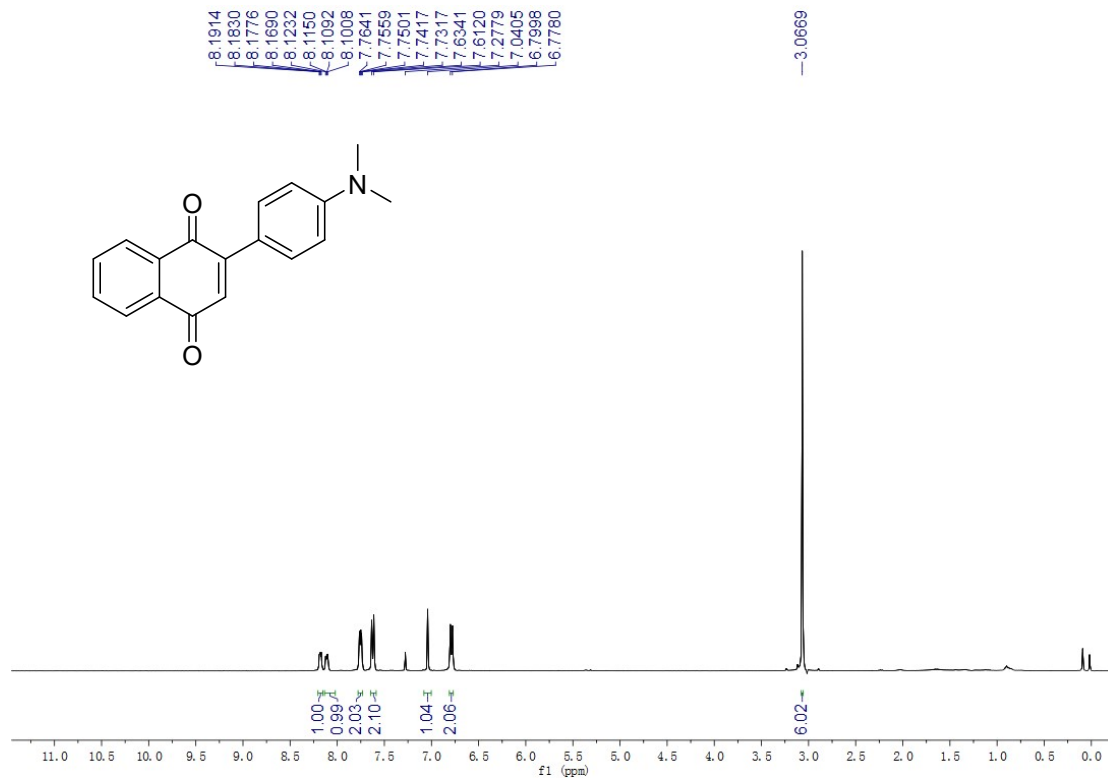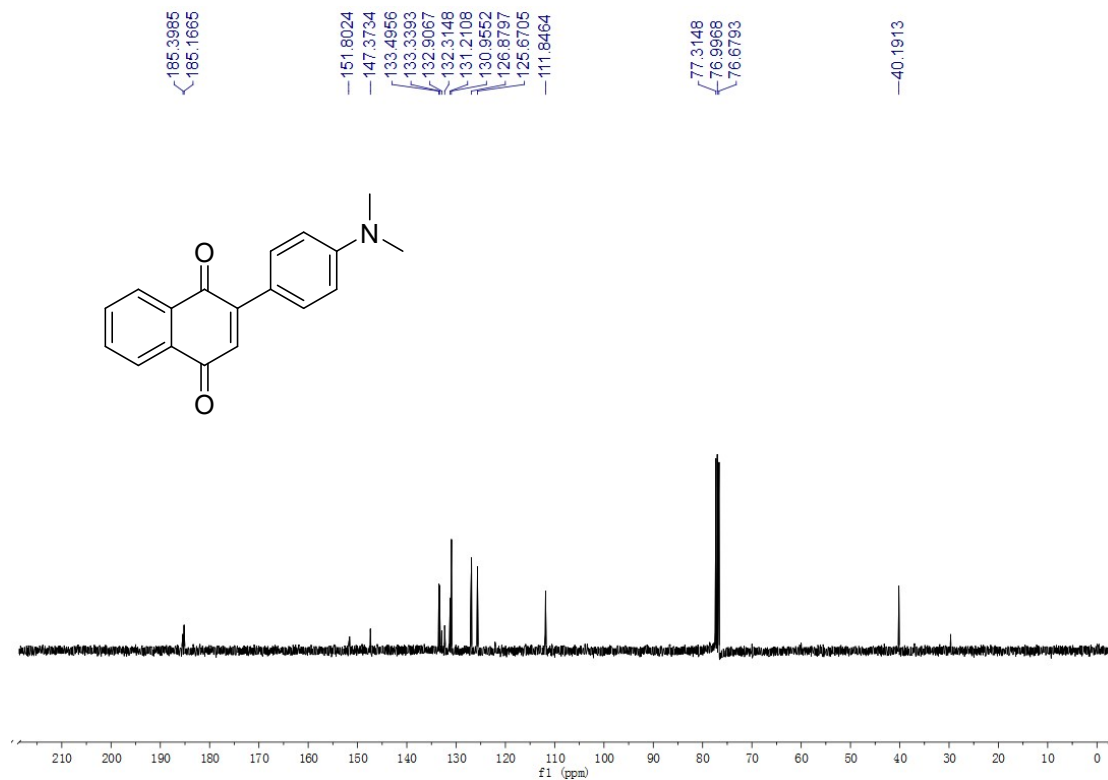

## 2-(4-(diethylamino)phenyl)naphthalene-1,4-dione (3b)

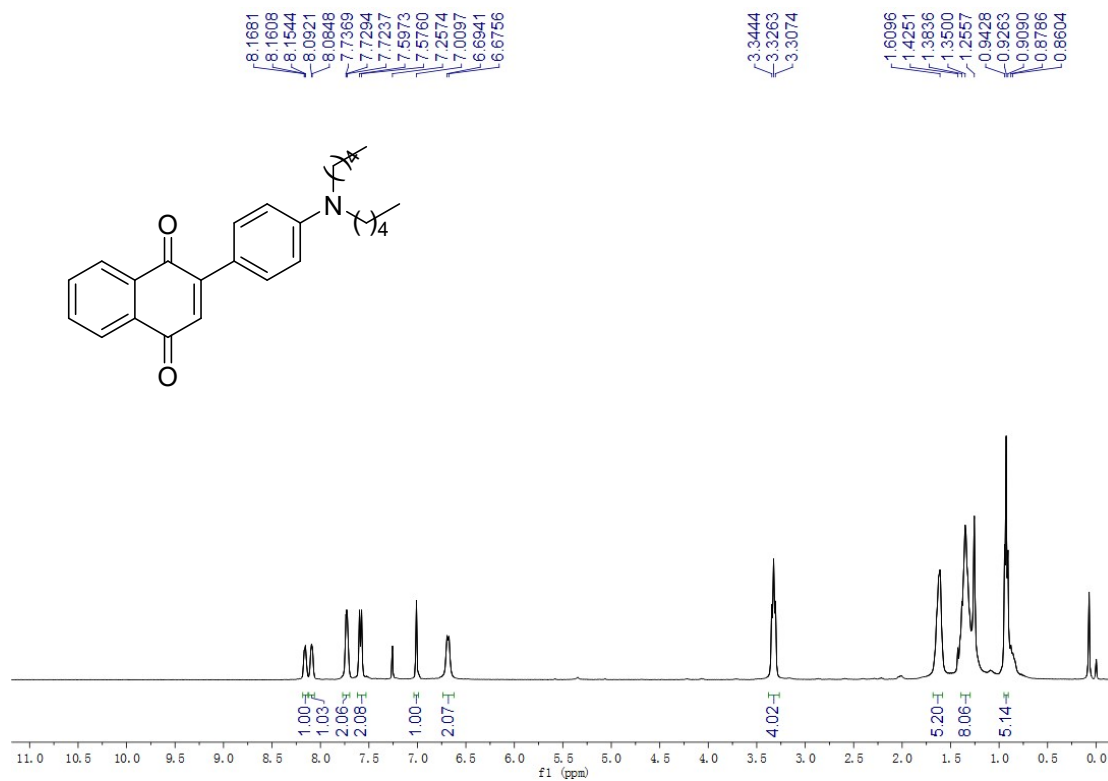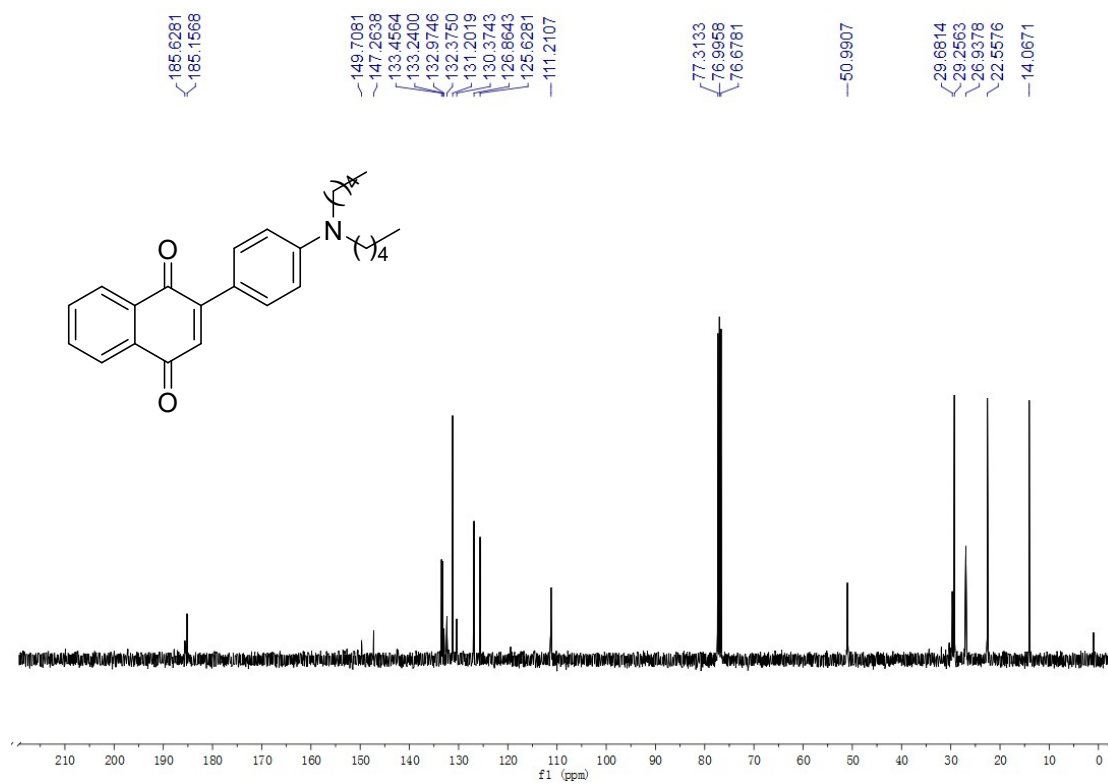

## 2-(4-(dibenzylamino)phenyl)naphthalene-1,4-dione (3c)

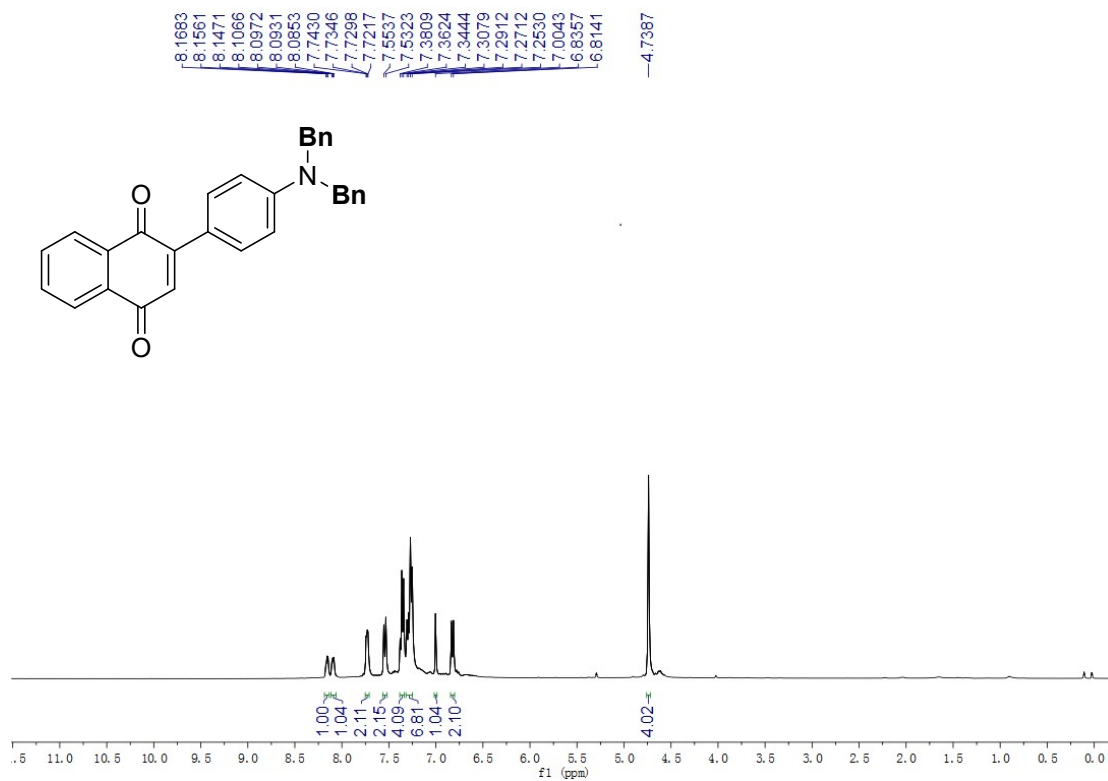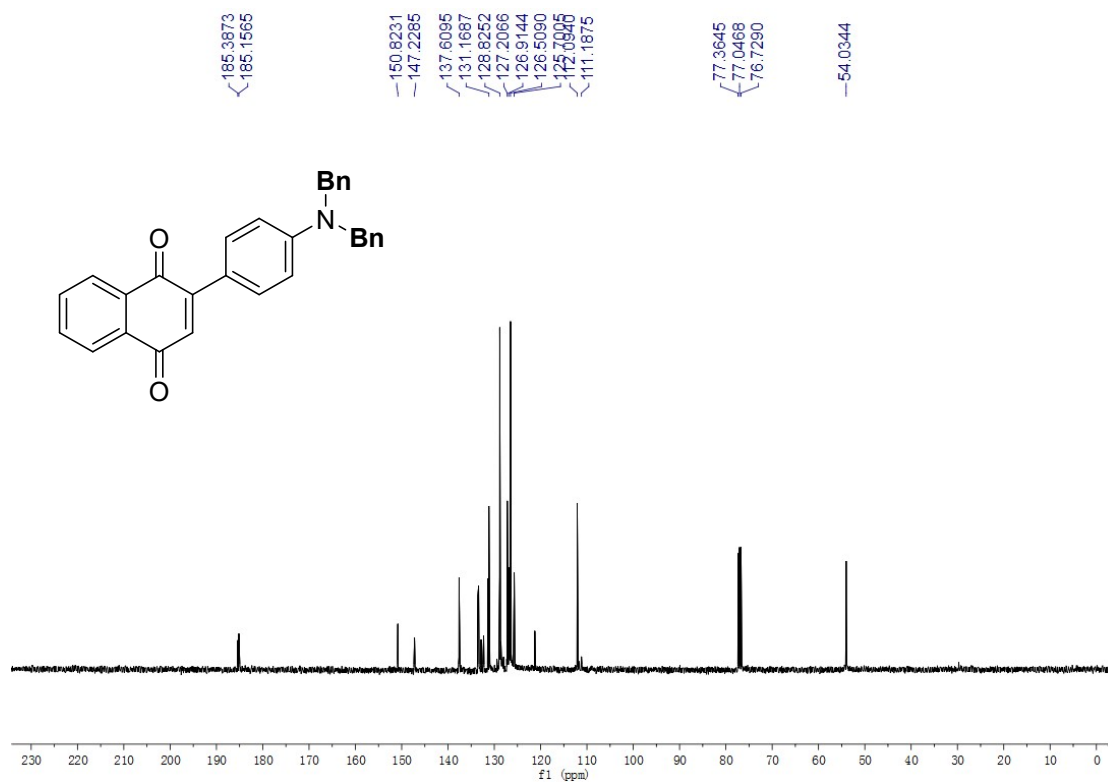

## 2-(4-(diallylamino)phenyl)naphthalene-1,4-dione (3d)

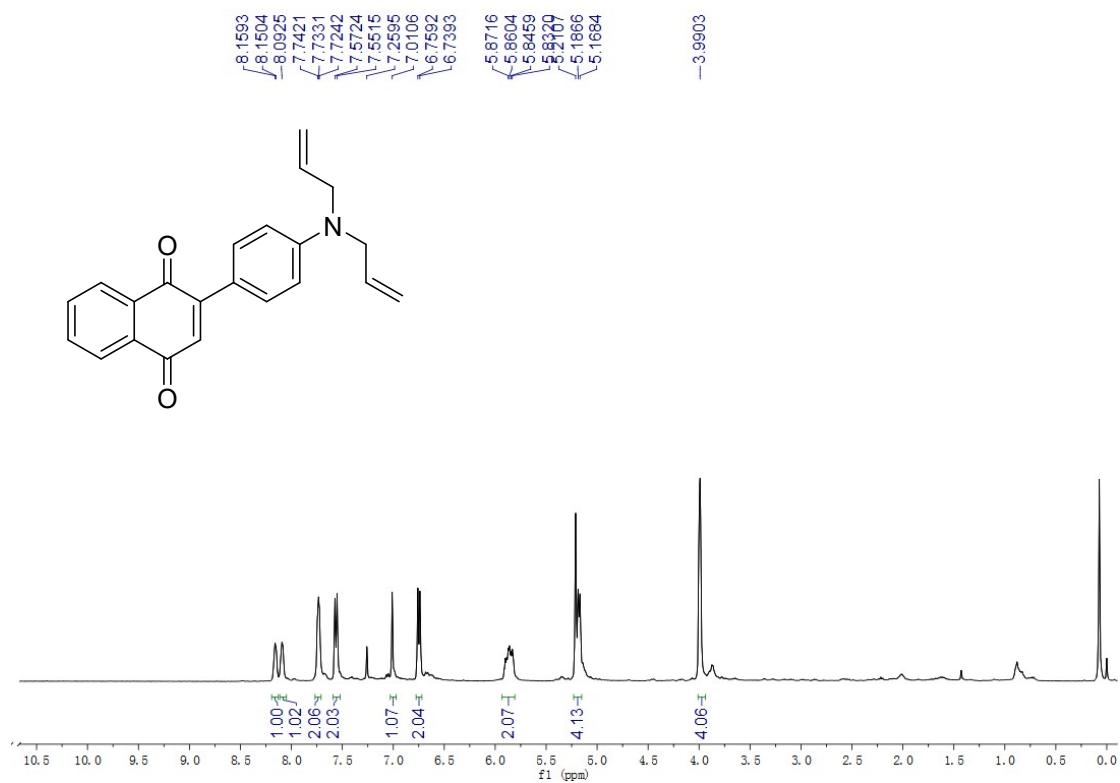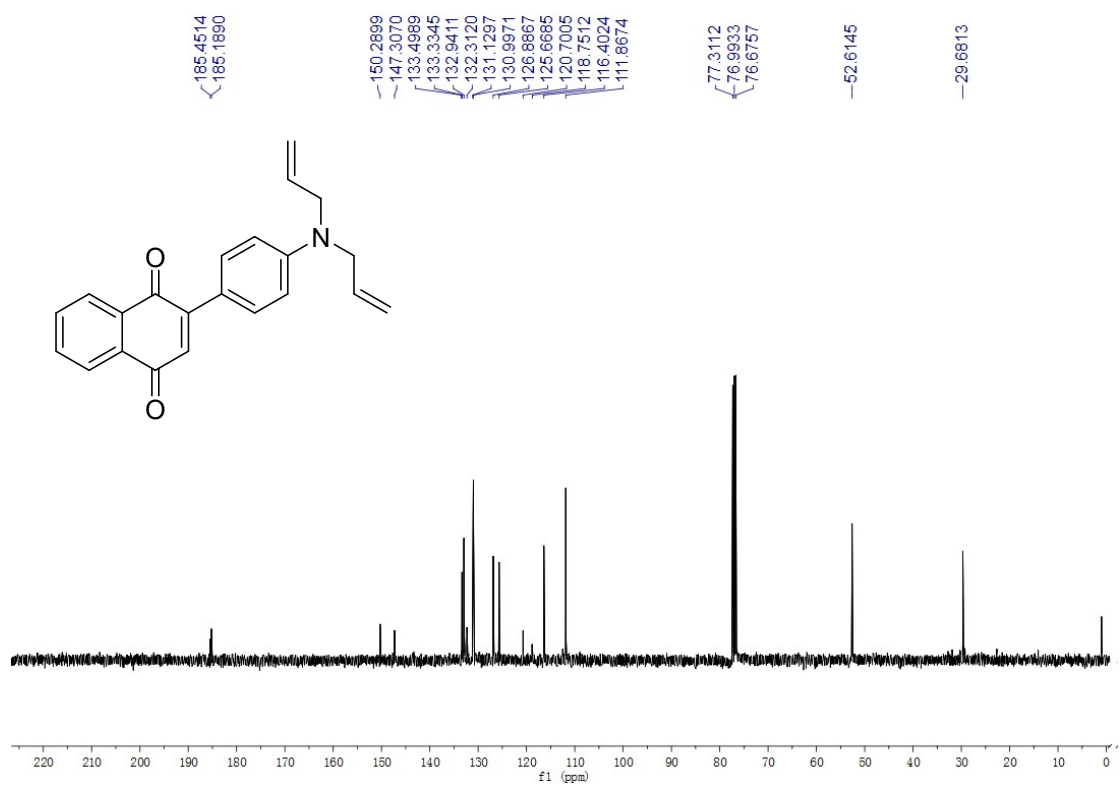



# 2-(4-(ethyl(methyl)amino)phenyl)naphthalene-1,4-dione (3e)

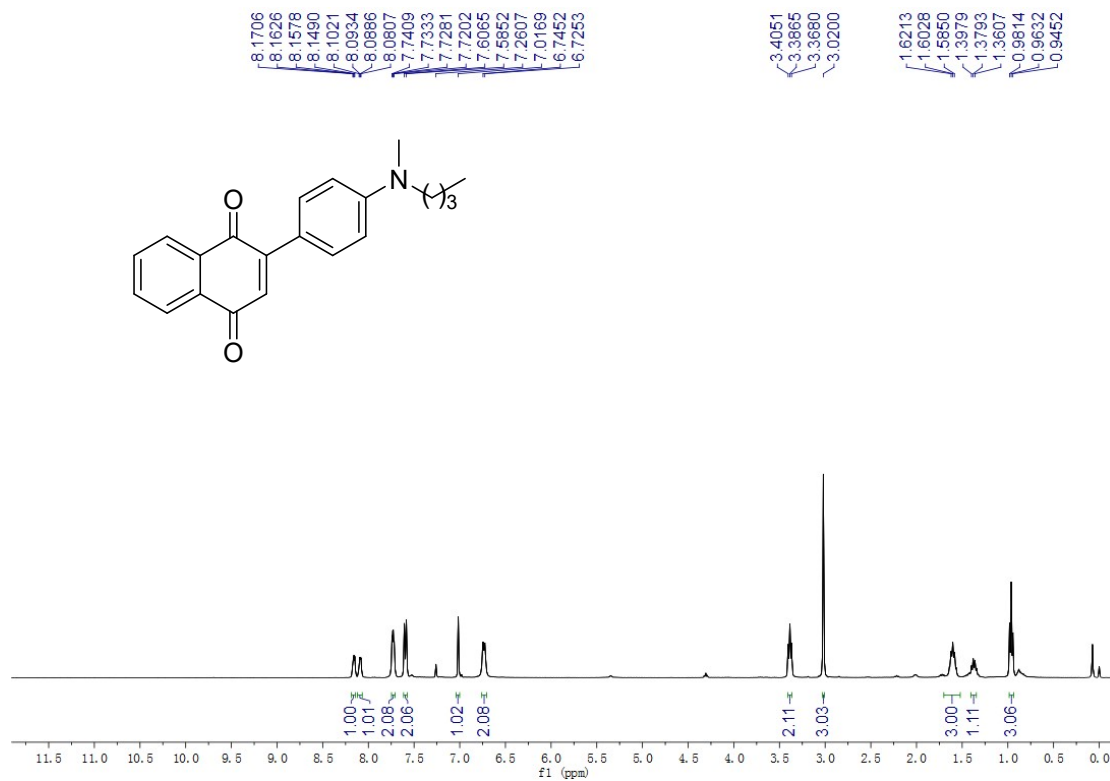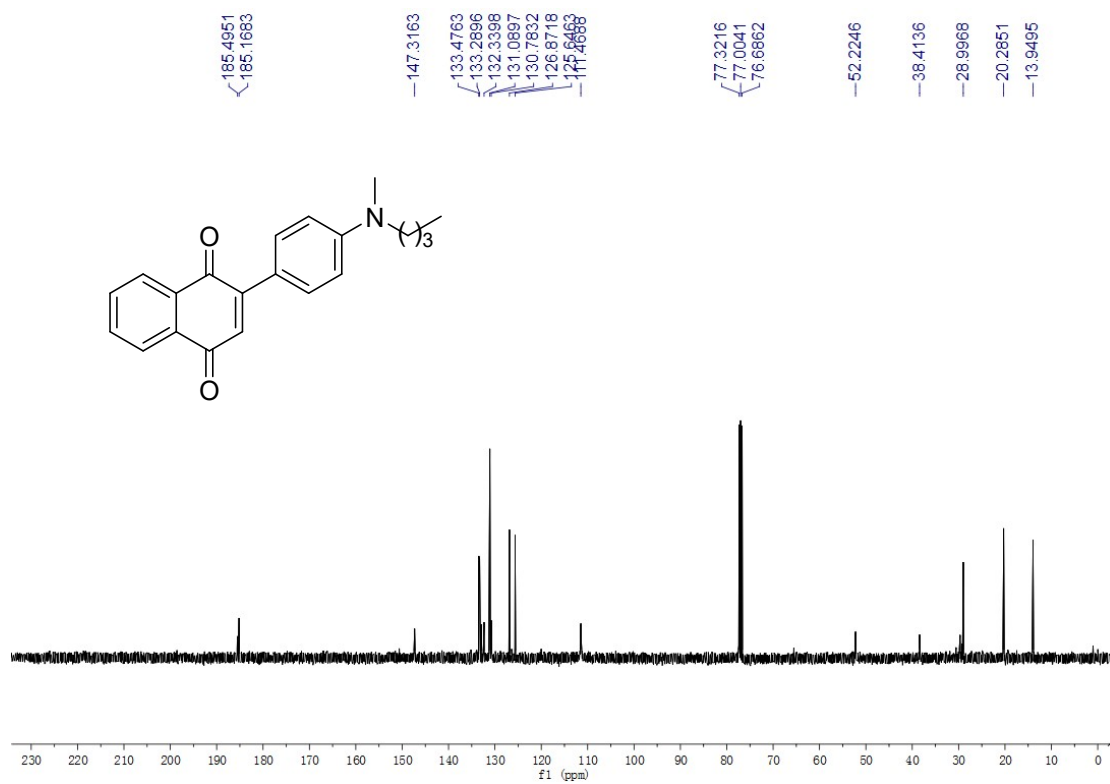

2-(4-(ethyl(methyl)amino)phenyl)naphthalene-1,4-dione (3f)

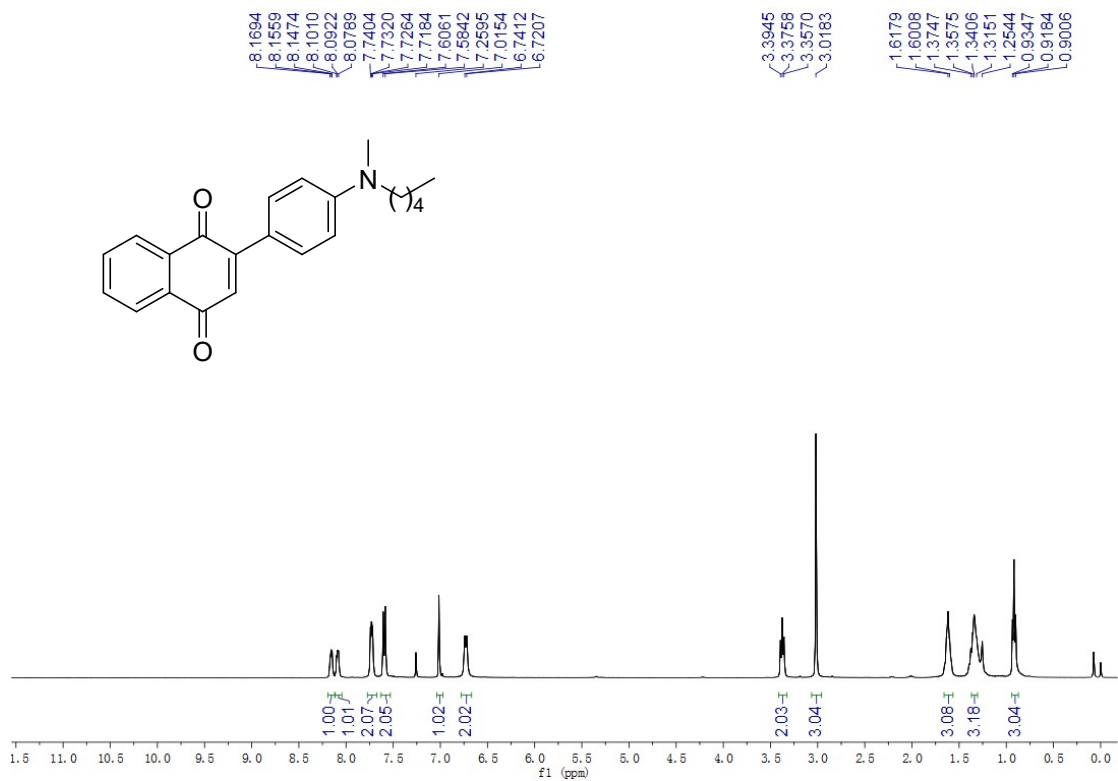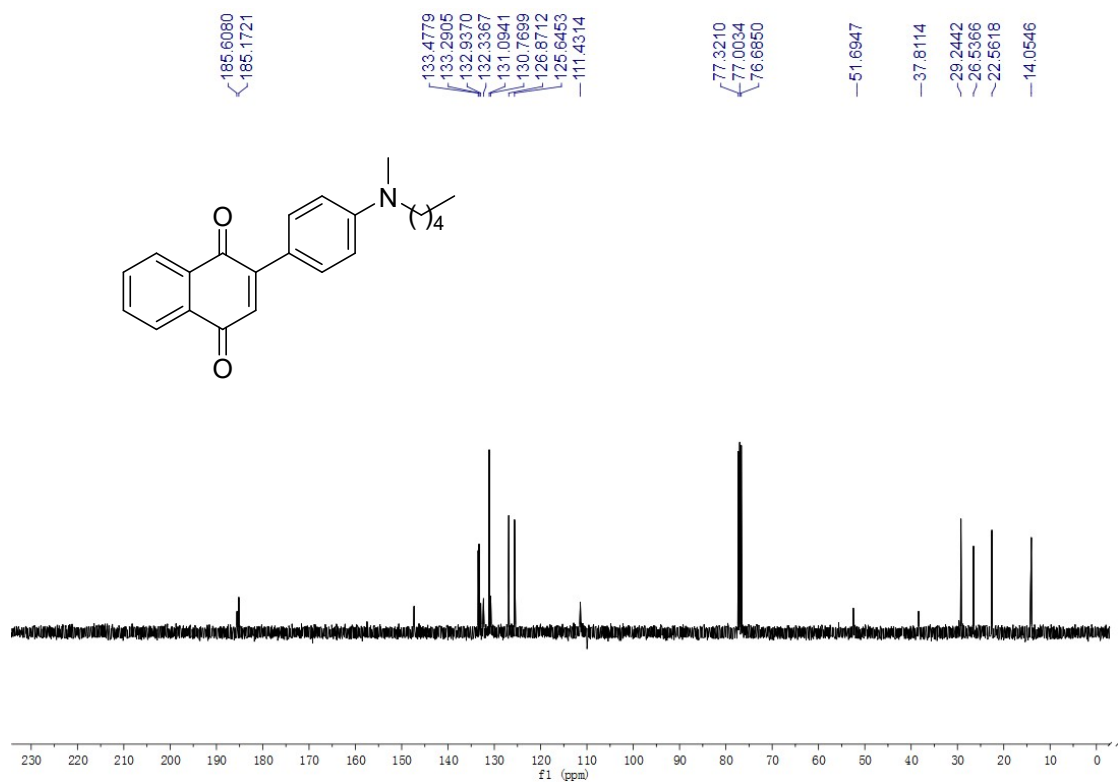

## 2-(4-(ethyl(methyl)amino)phenyl)naphthalene-1,4-dione (3g)

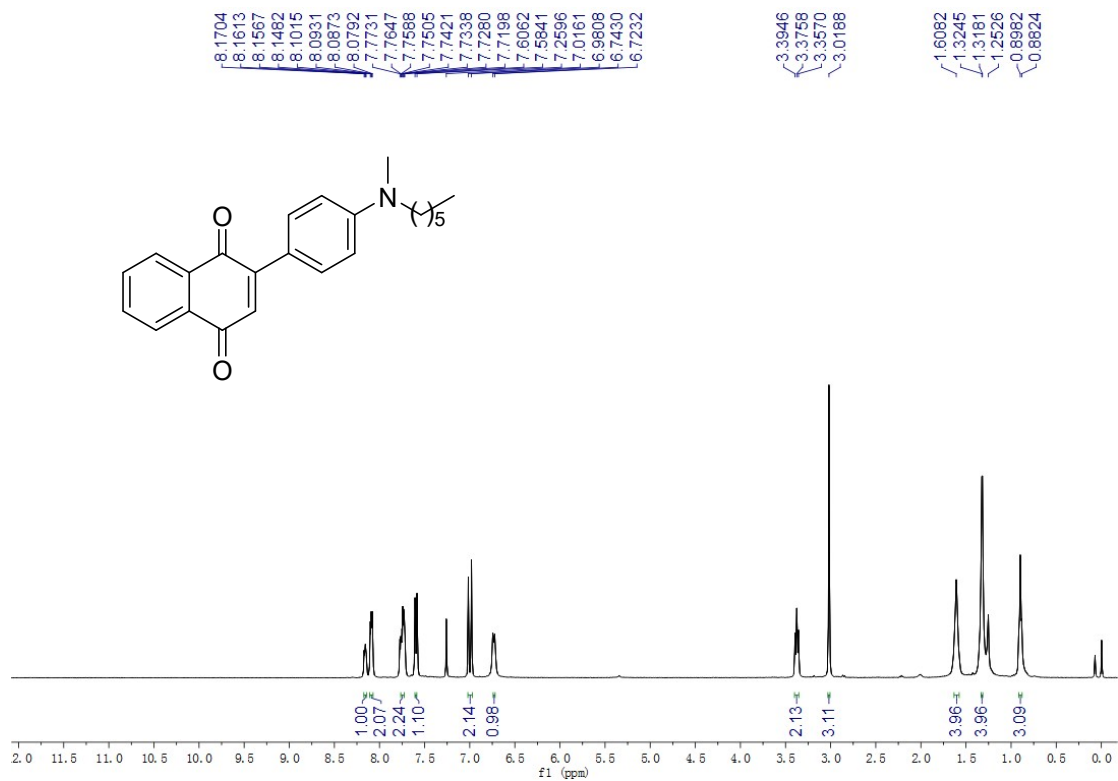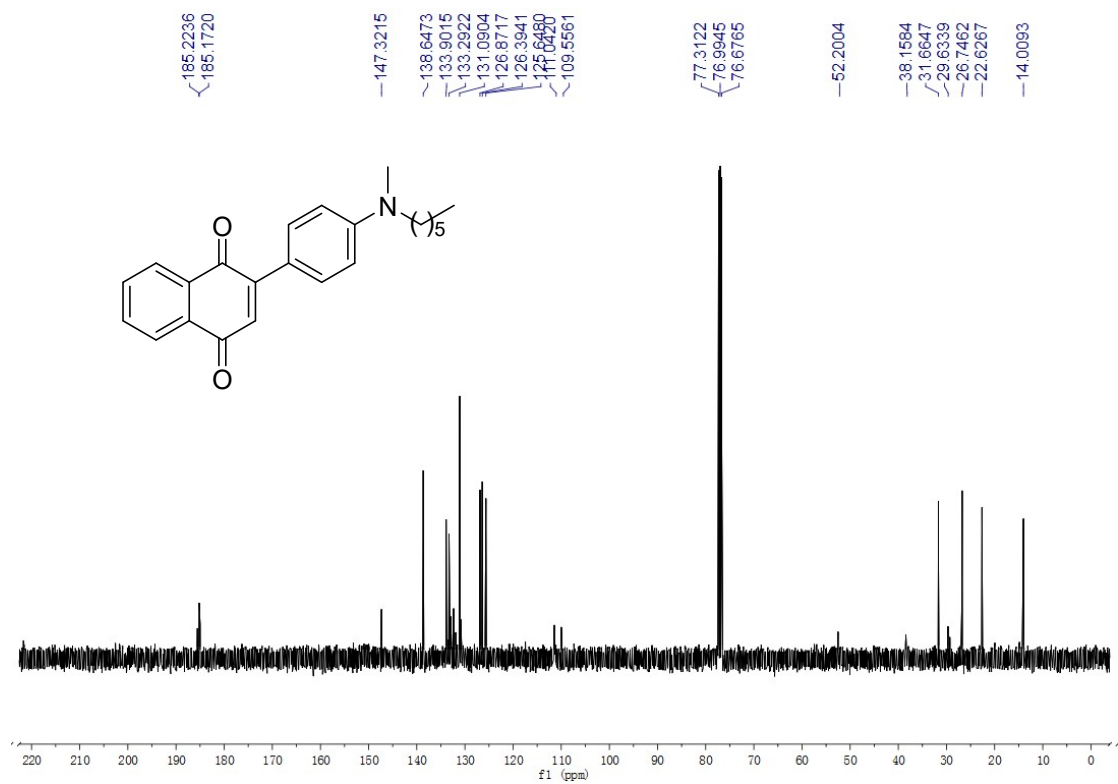

### 2-(4-((cyclohexylmethyl)(methyl)amino)phenyl)naphthalene-1,4-dione (3h)

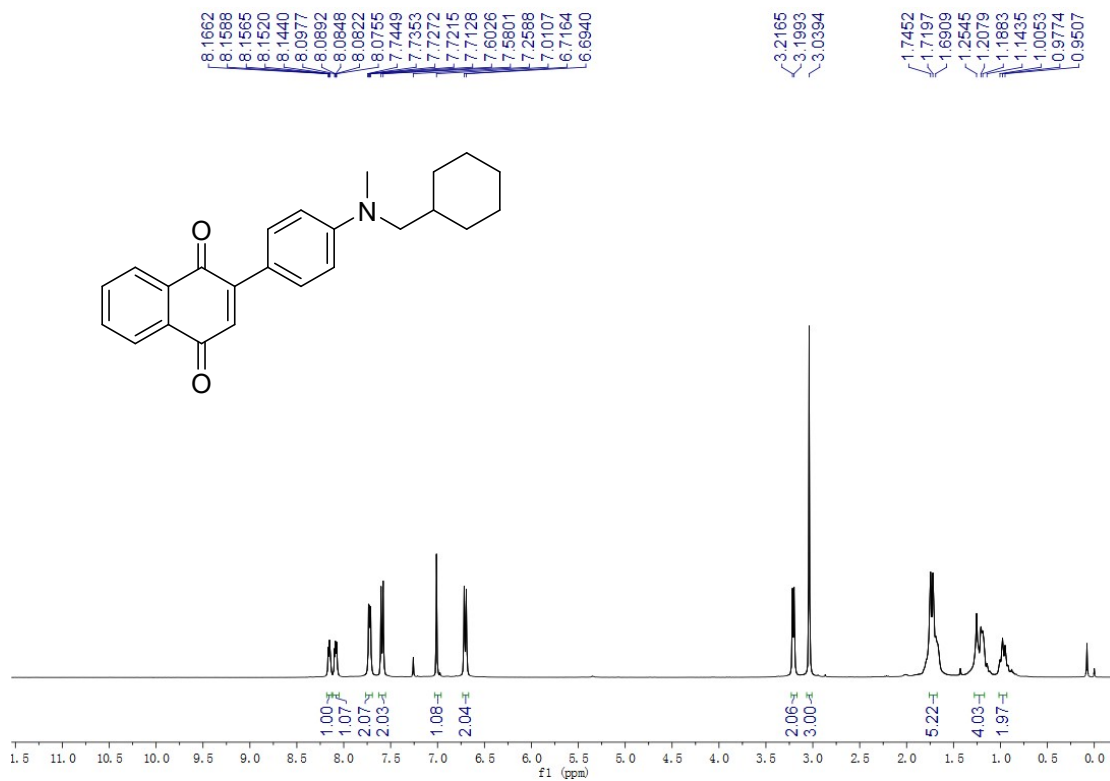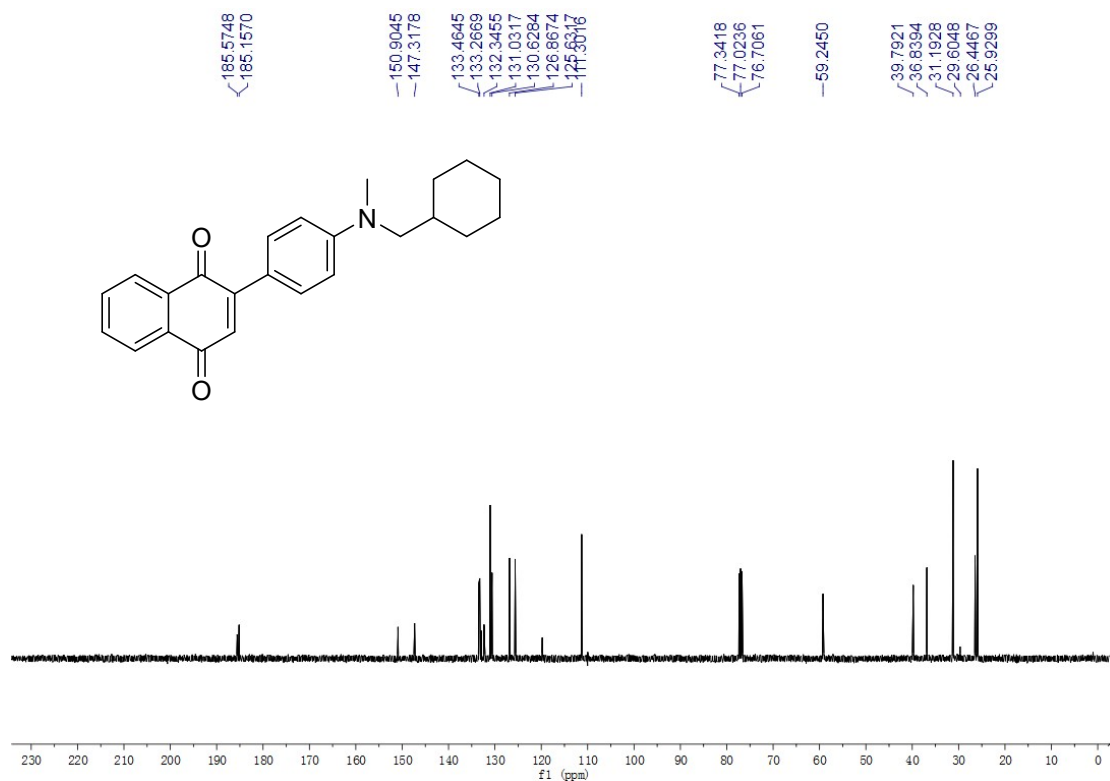

2-(4-(benzyl(methyl)amino)phenyl)naphthalene-1,4-dione (3i)

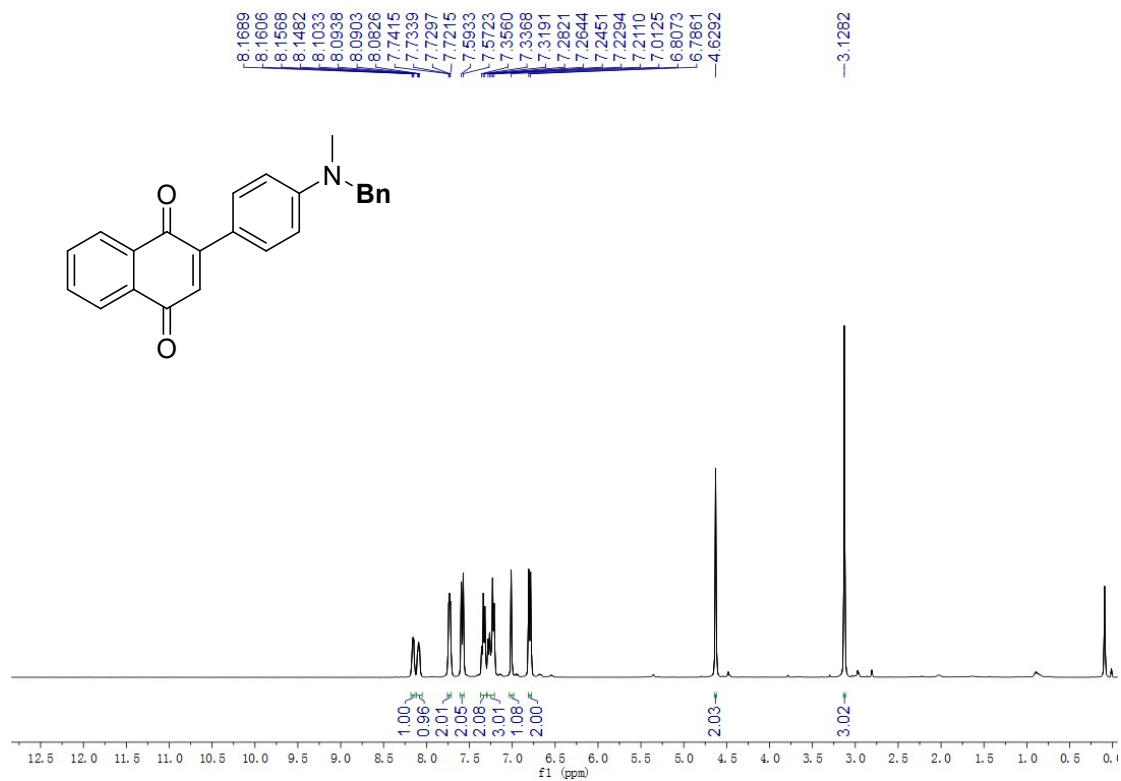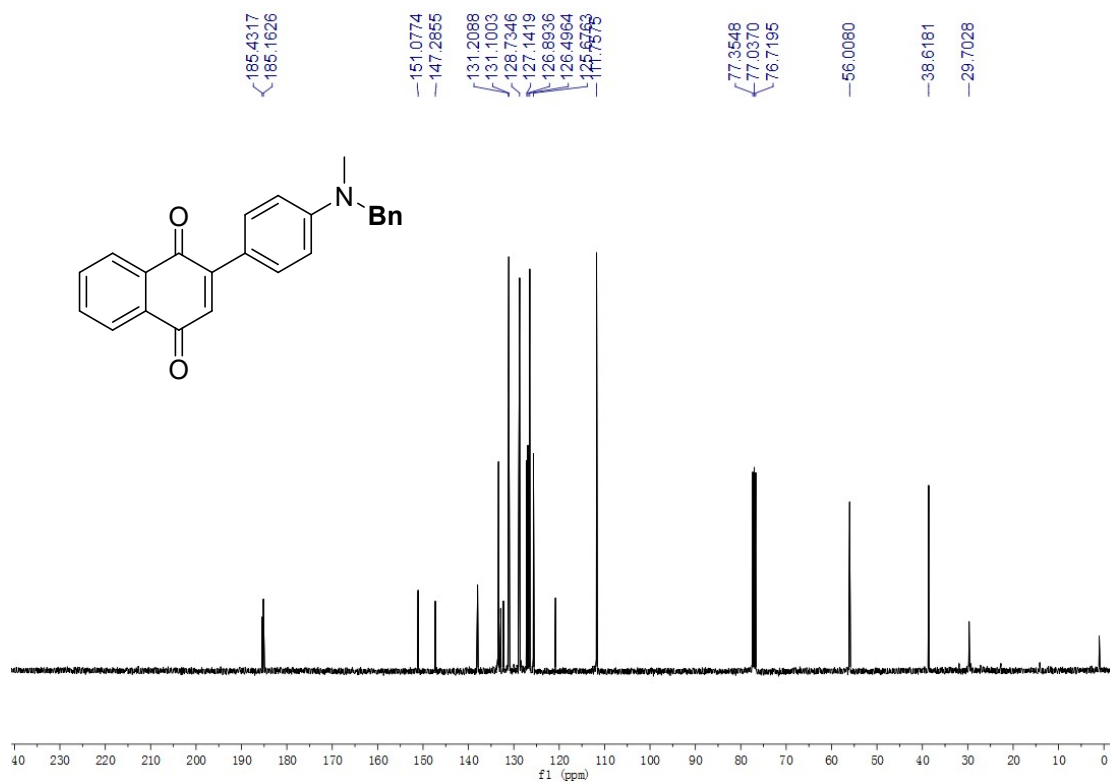

## 2-(4-(pyrrolidin-1-yl)phenyl)naphthalene-1,4-dione (3j)

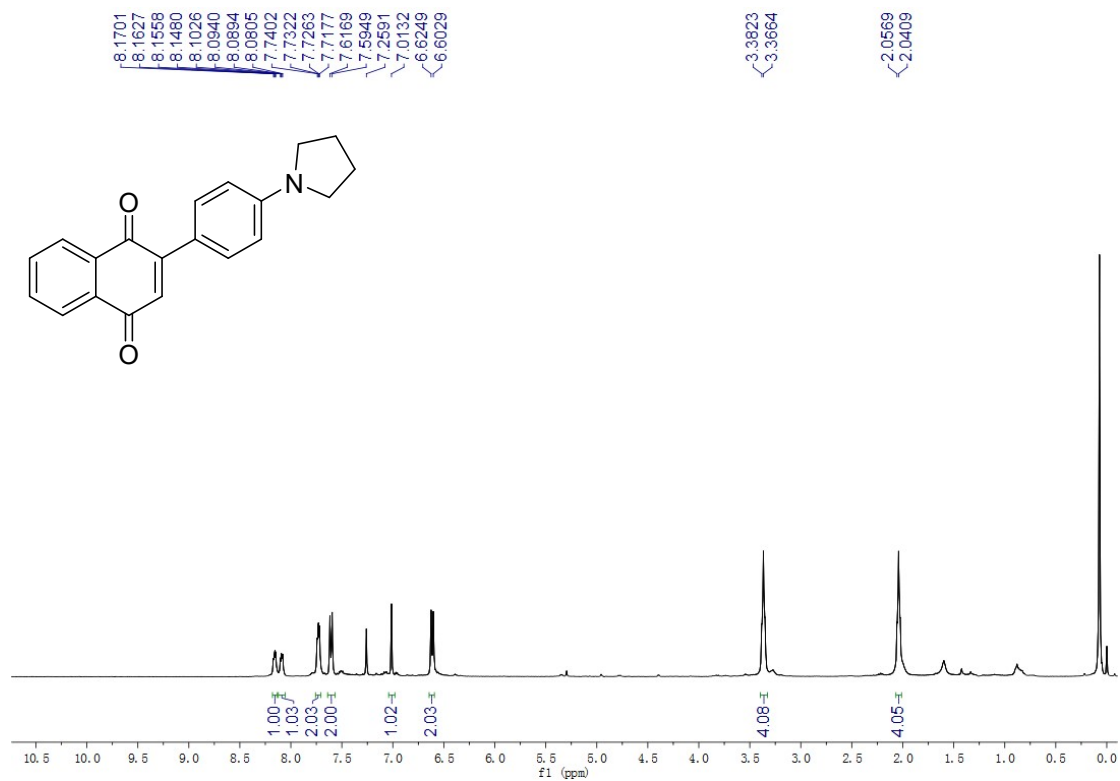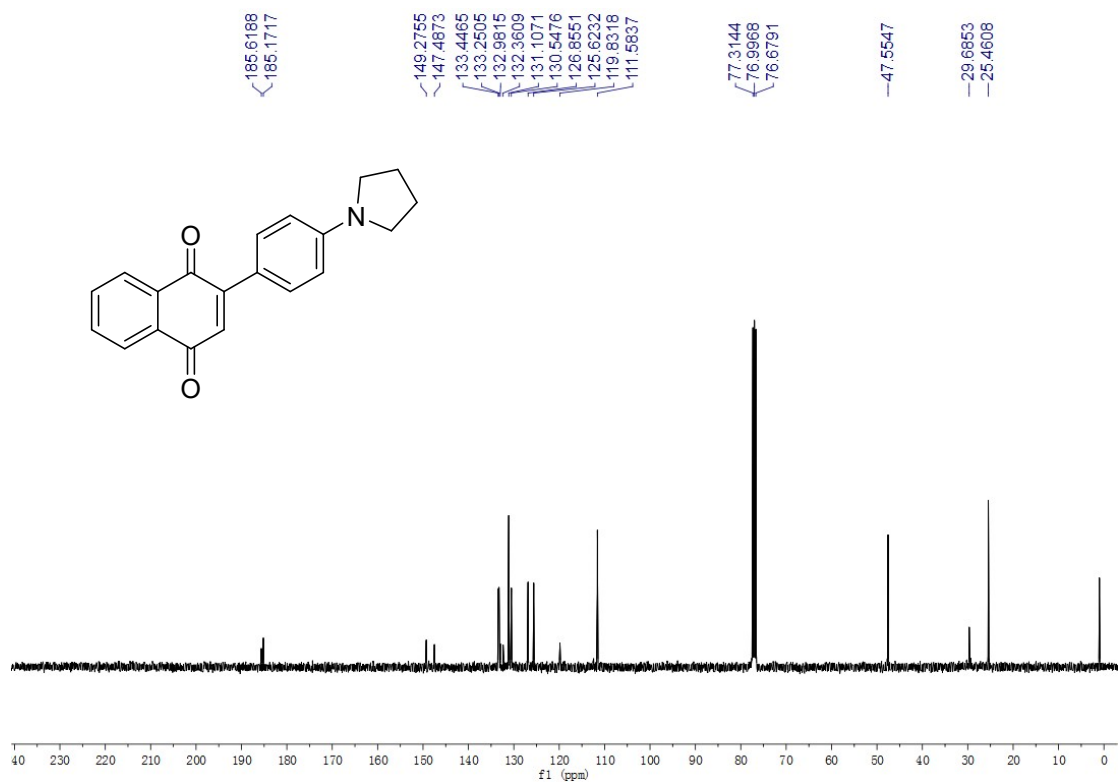

# 2-(4-(methylamino)phenyl)naphthalene-1,4-dione (3k)

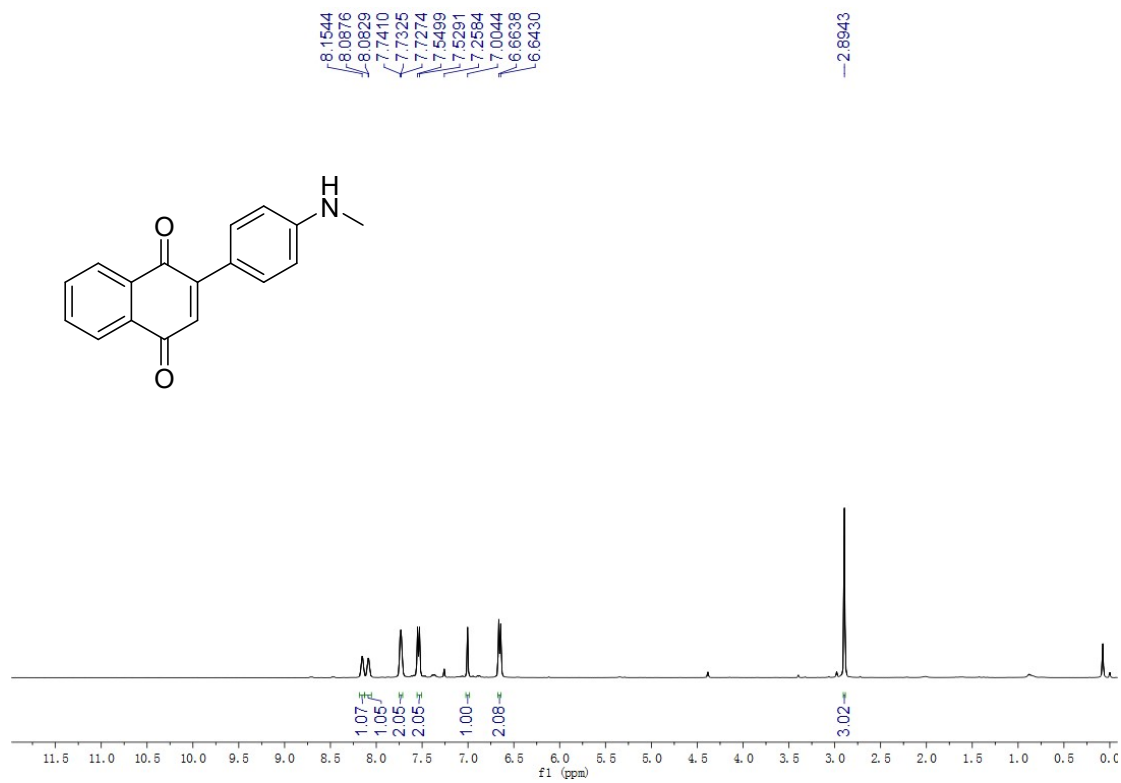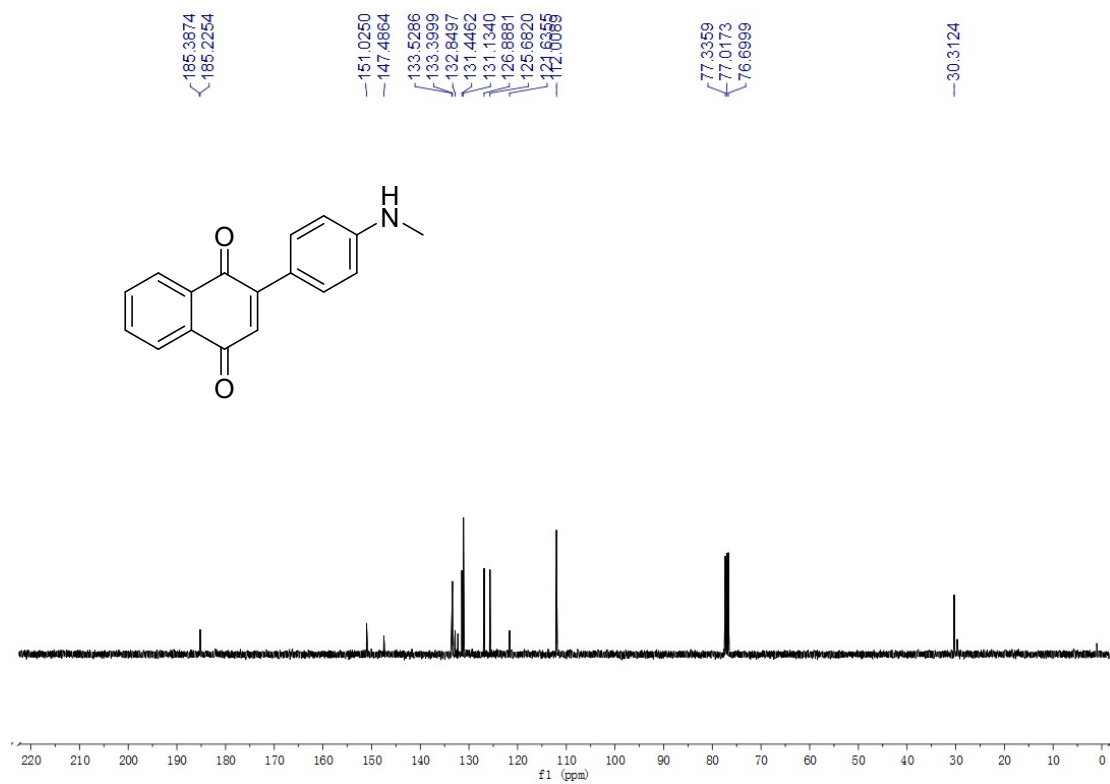

## 2-(4-(ethylamino)phenyl)naphthalene-1,4-dione (31)

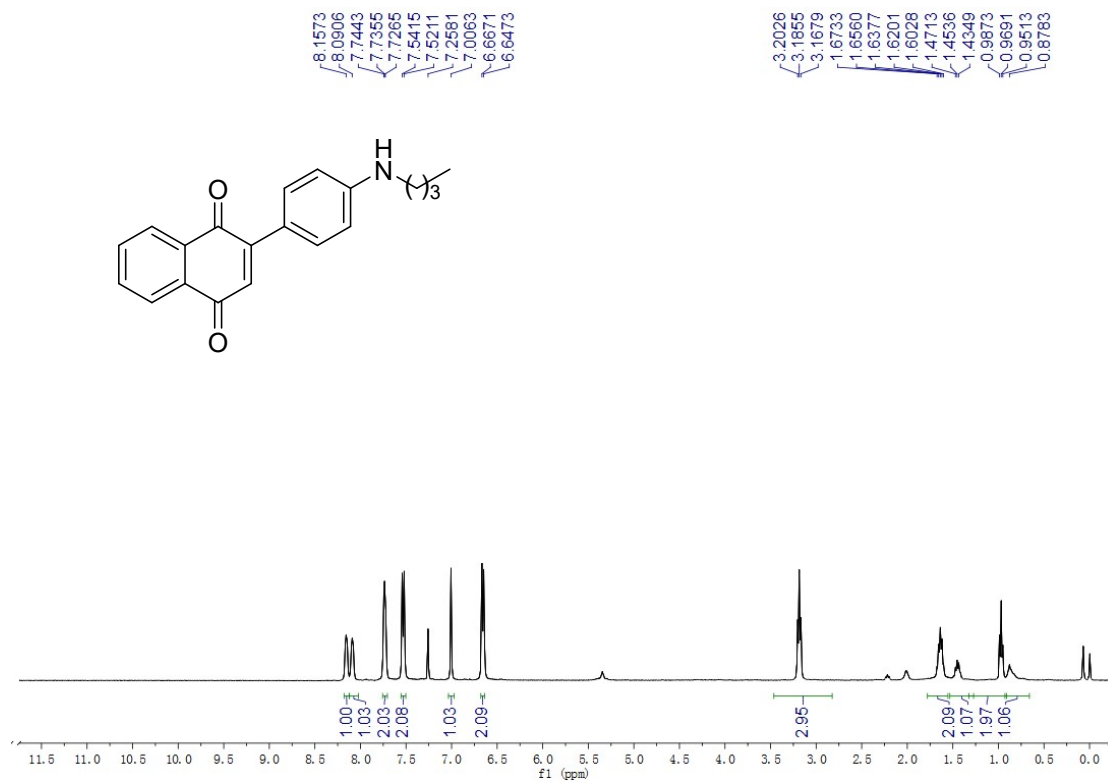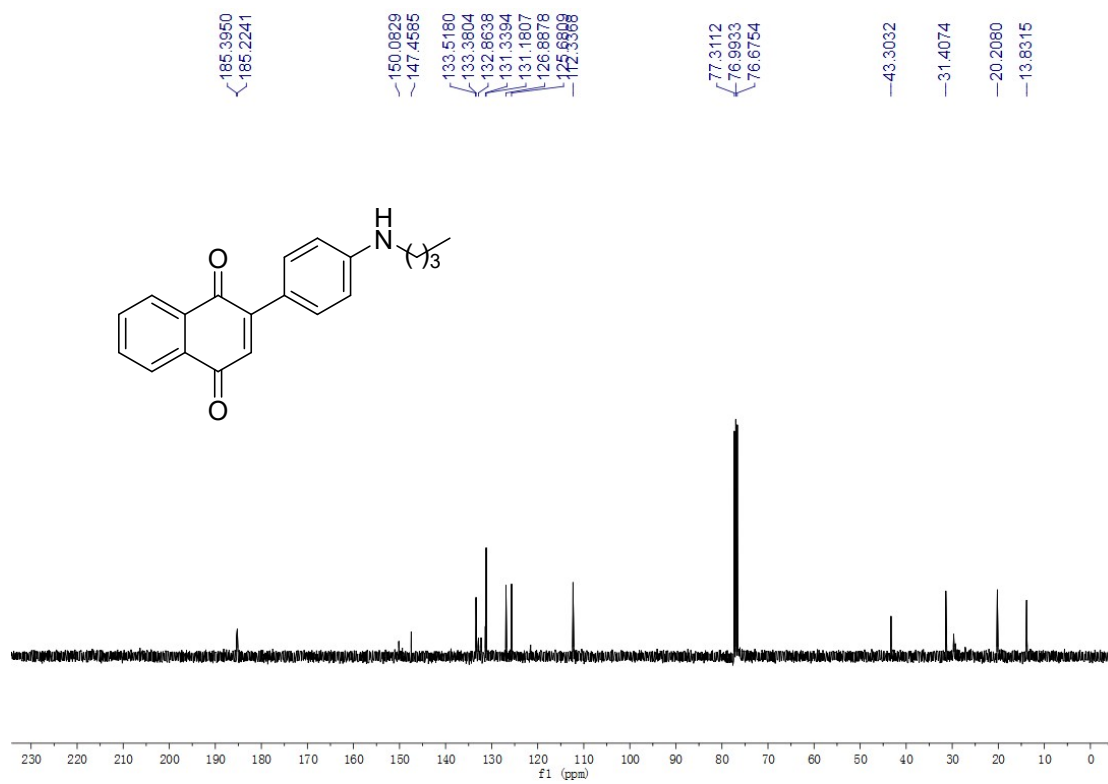



2-(4-(dimethylamino)-2-methylphenyl)naphthalene-1,4-dione (3m)

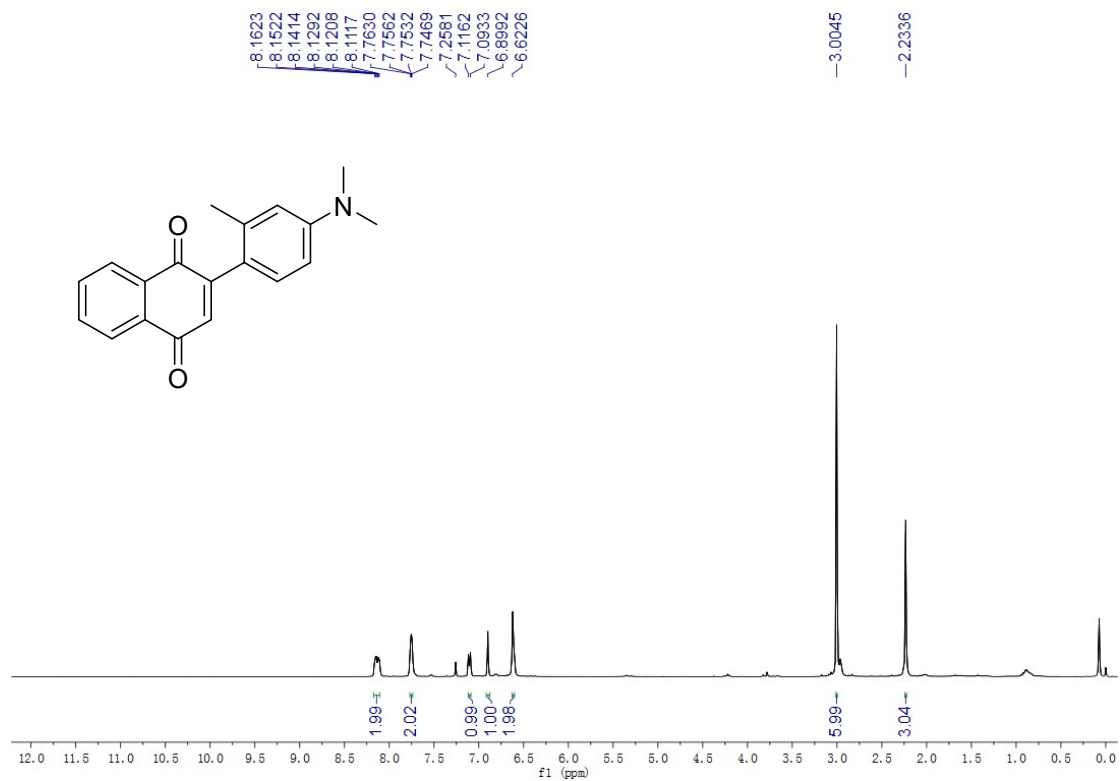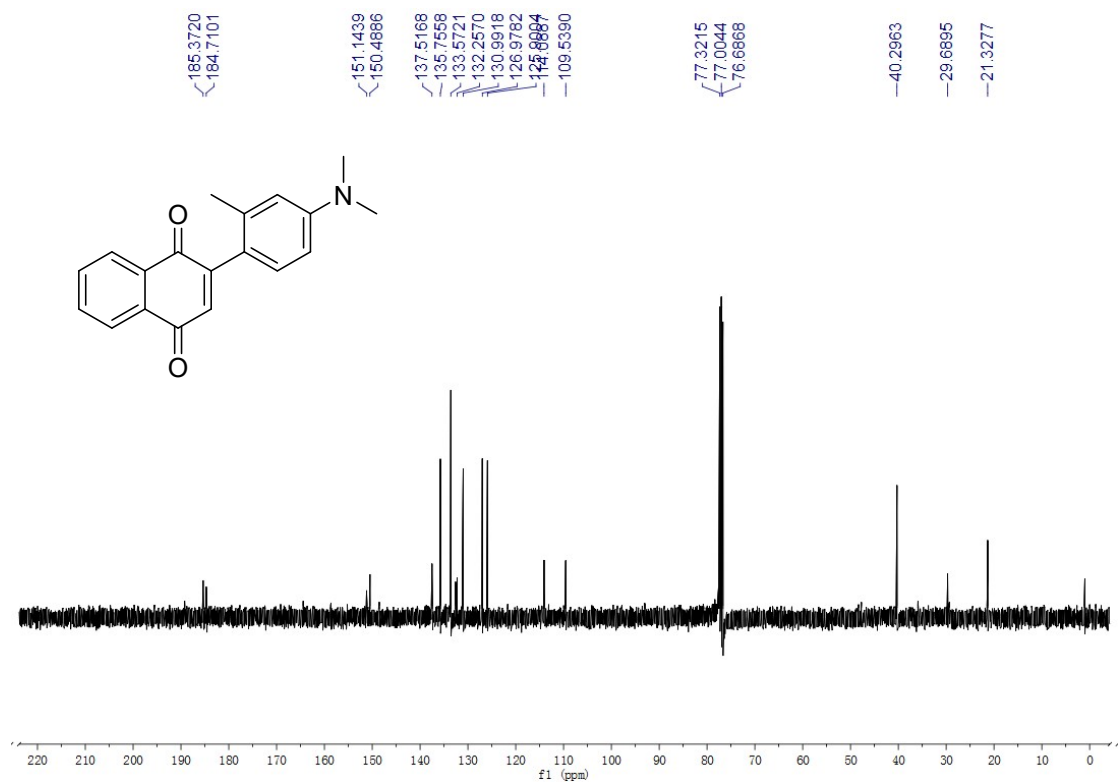

## 2-(1*H*-indol-3-yl)naphthalene-1,4-dione (3n)

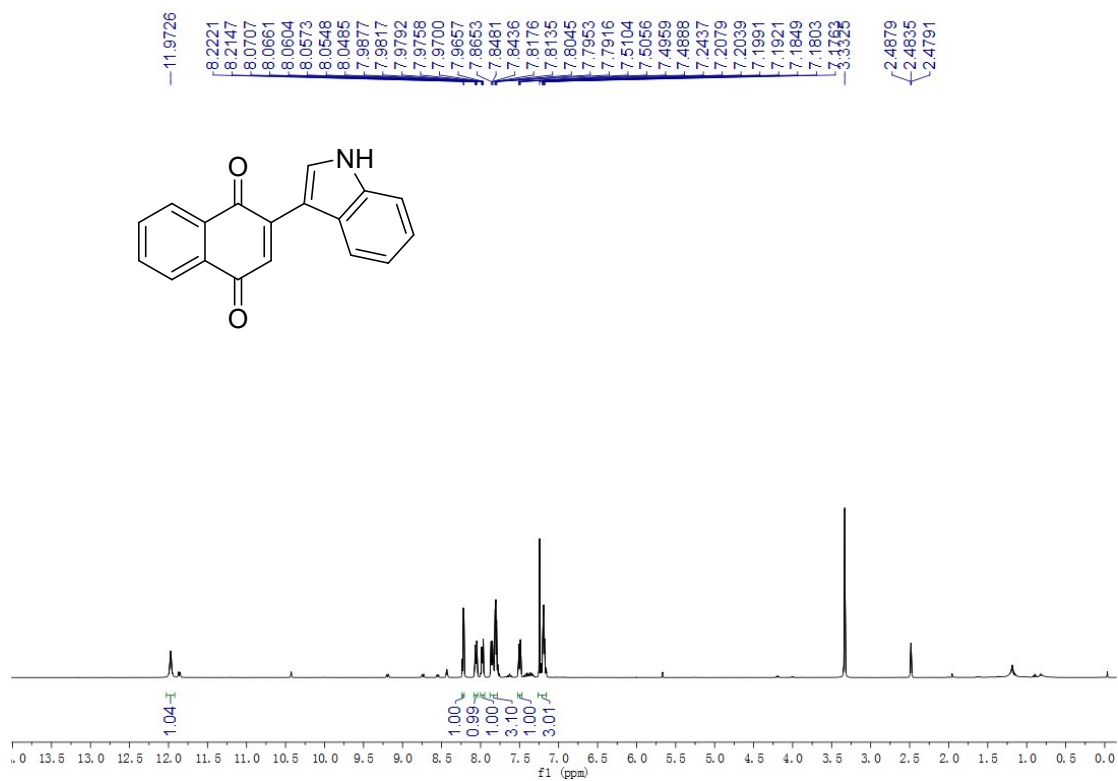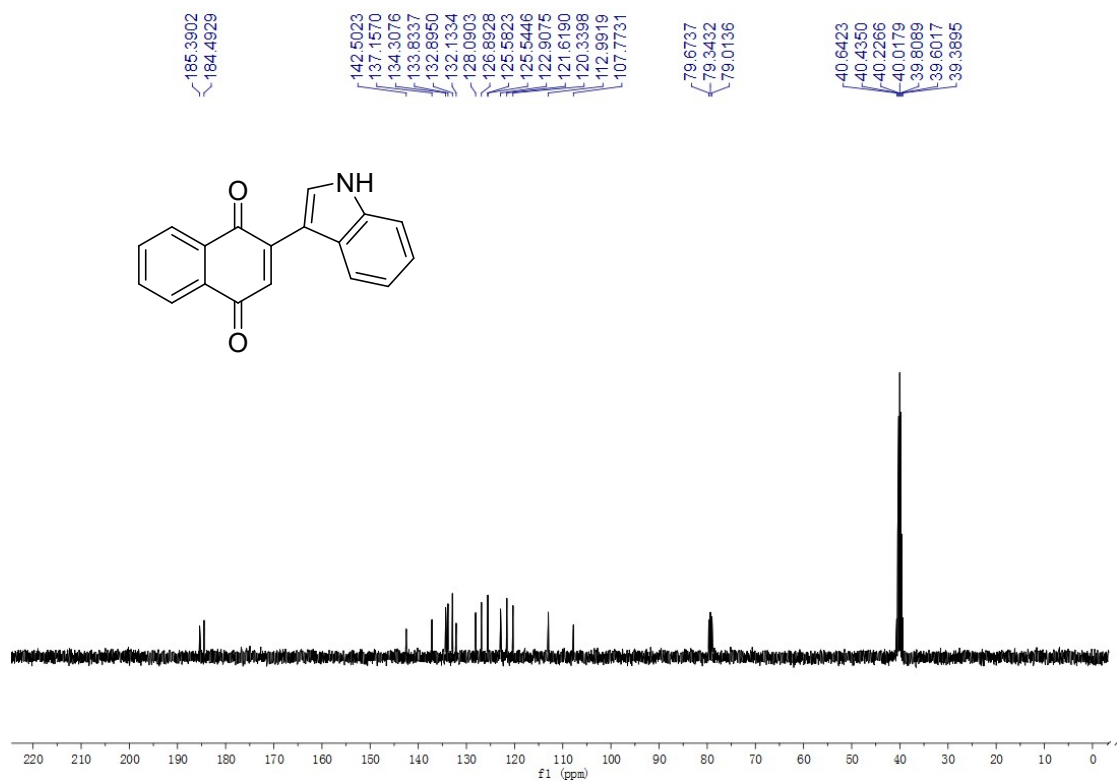

Methyl 3-(1,4-dioxo-1,4-dihydronaphthalen-2-yl)-1H-indole-2-carboxylate (3o)

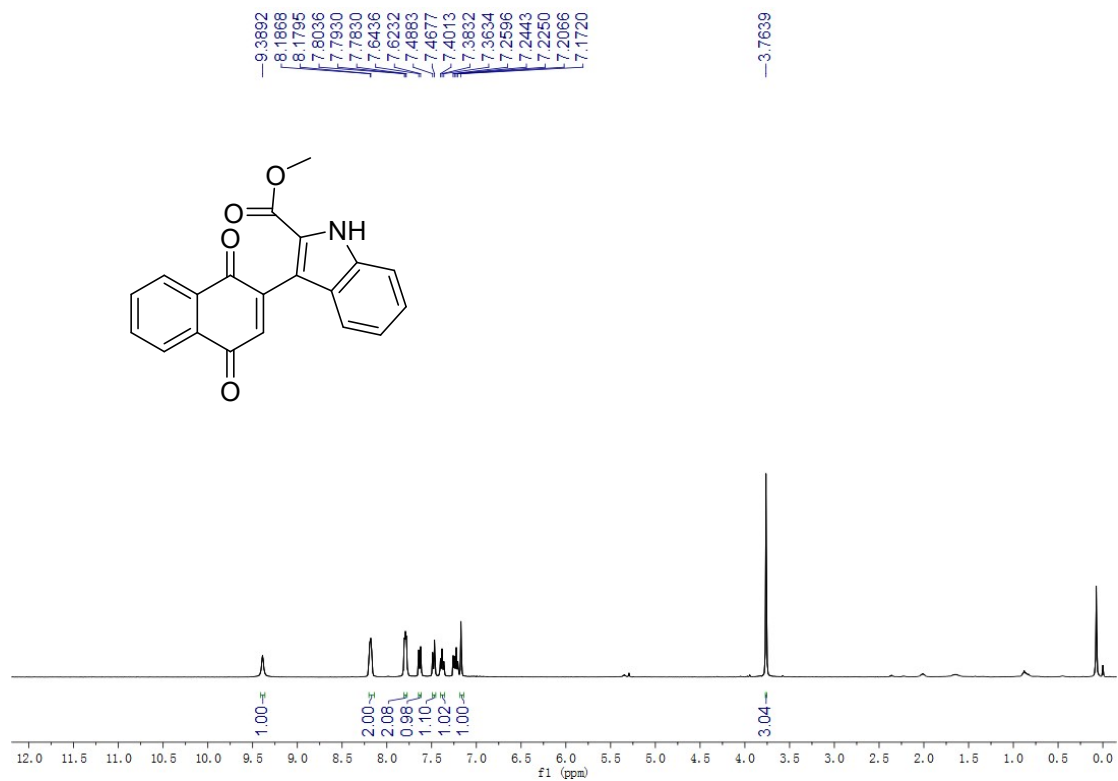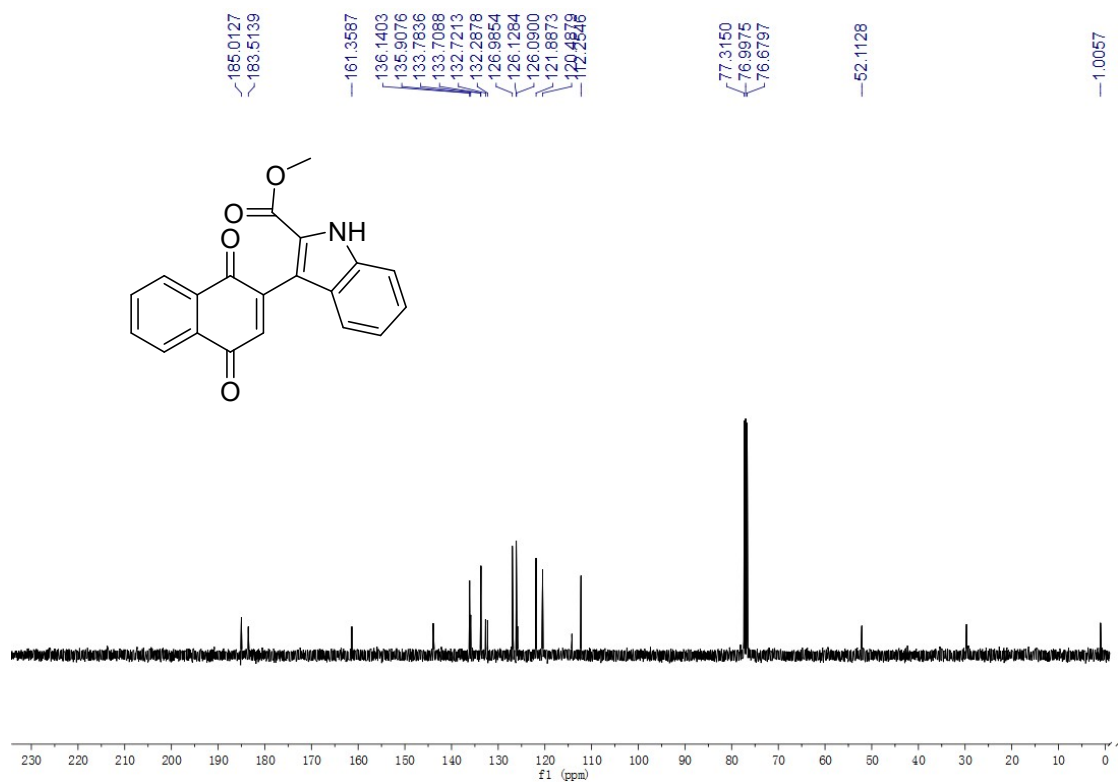

# 2-(4-chloro-1H-indol-3-yl)naphthalene-1,4-dione (3p)

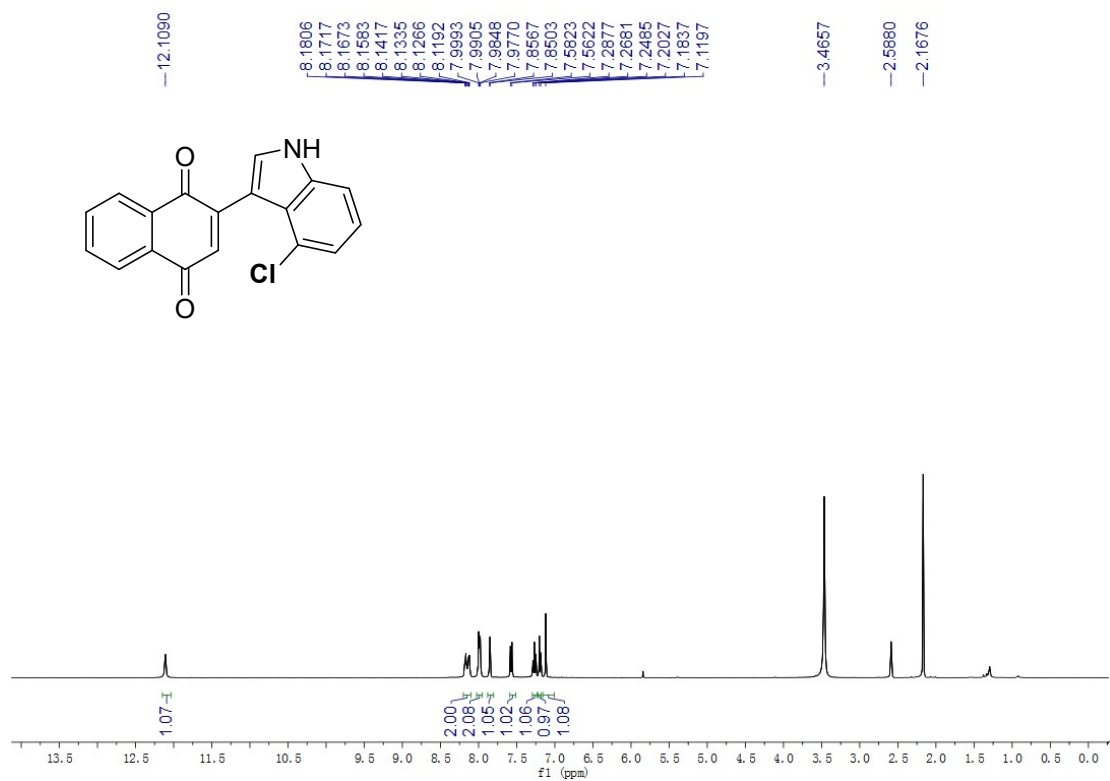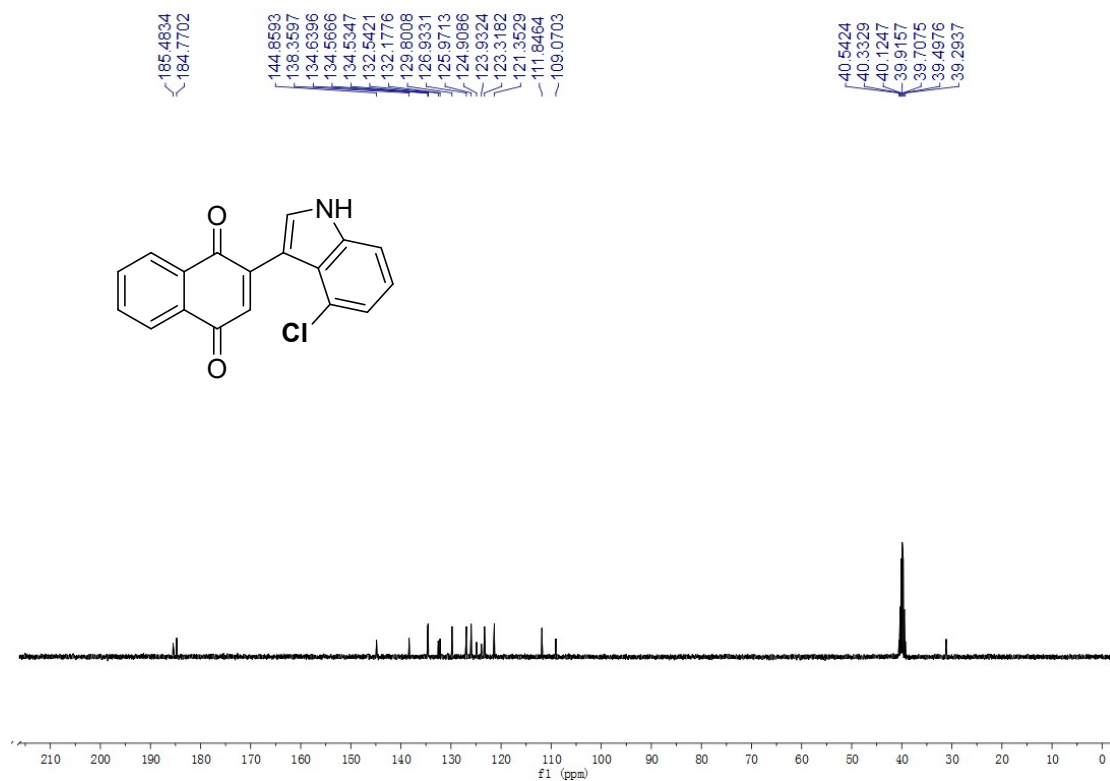

2-(5-methoxy-1*H*-indol-3-yl)naphthalene-1,4-dione (3q)

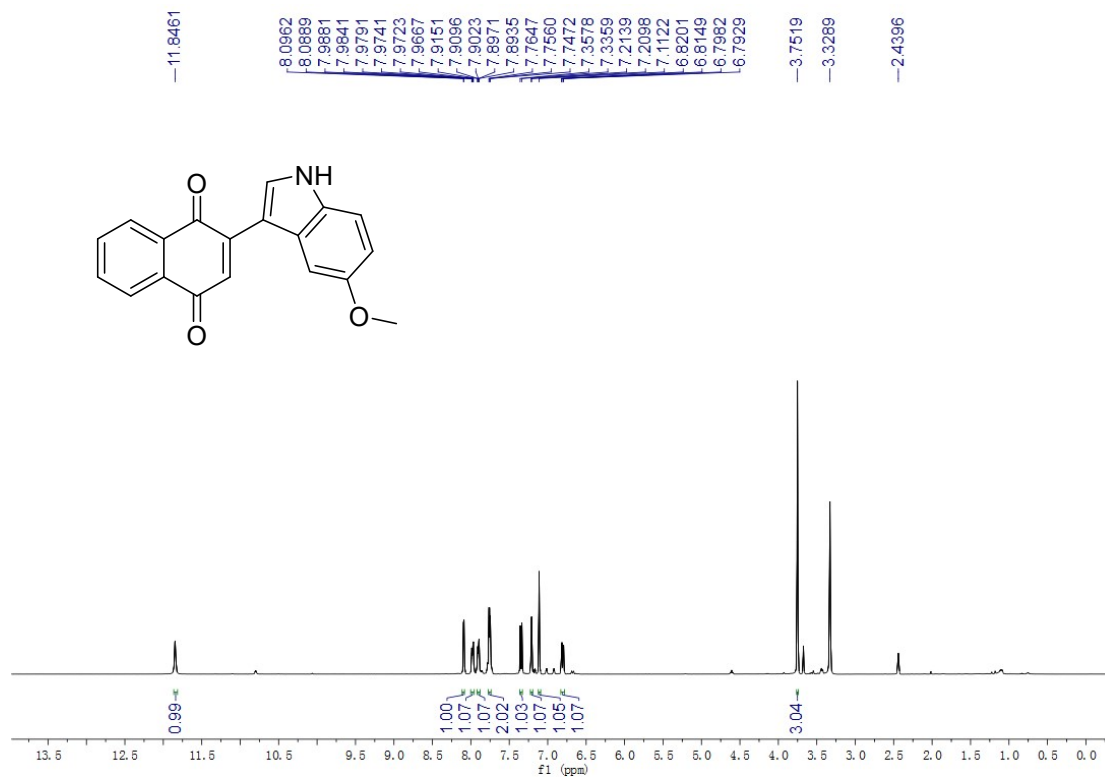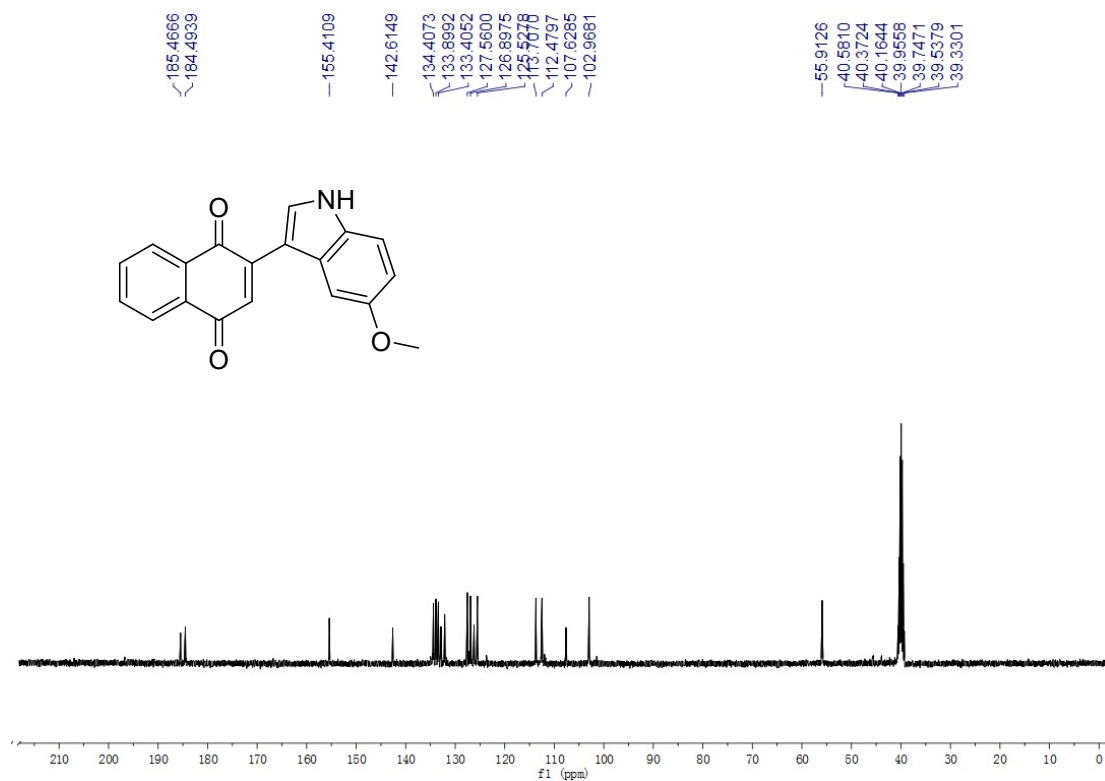

# 2-chloro-3-(4-(dimethylamino)phenyl)naphthalene-1,4-dione (3r)

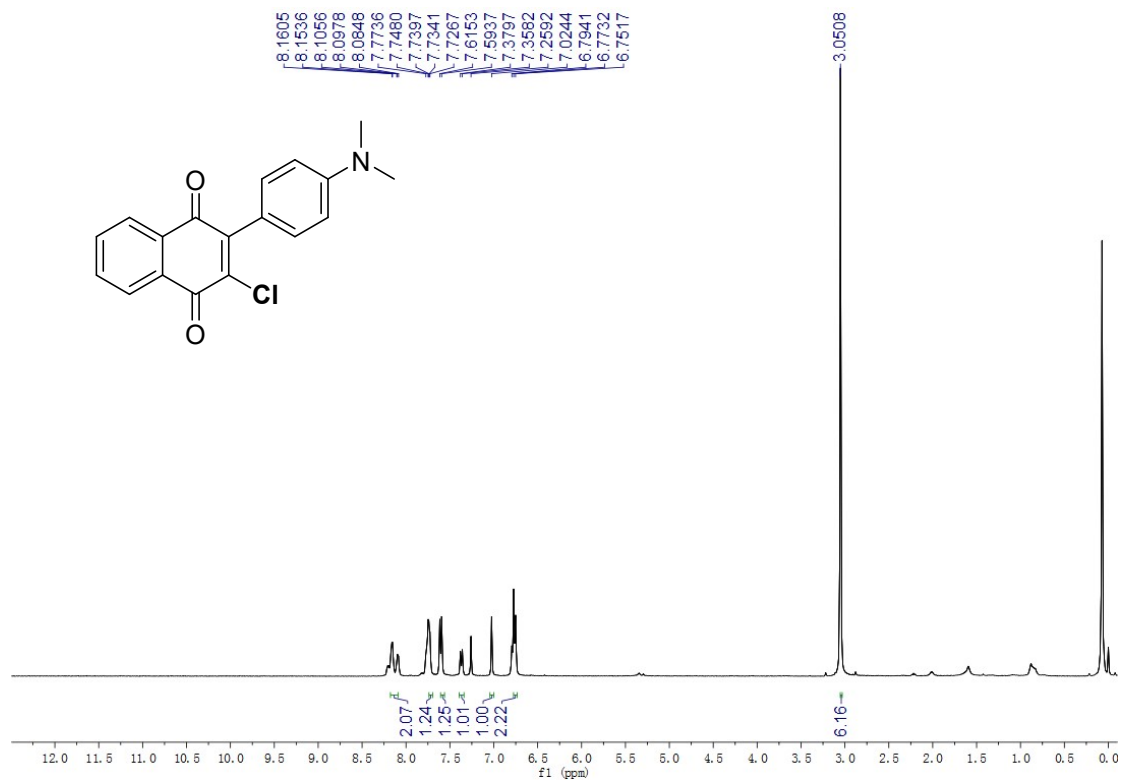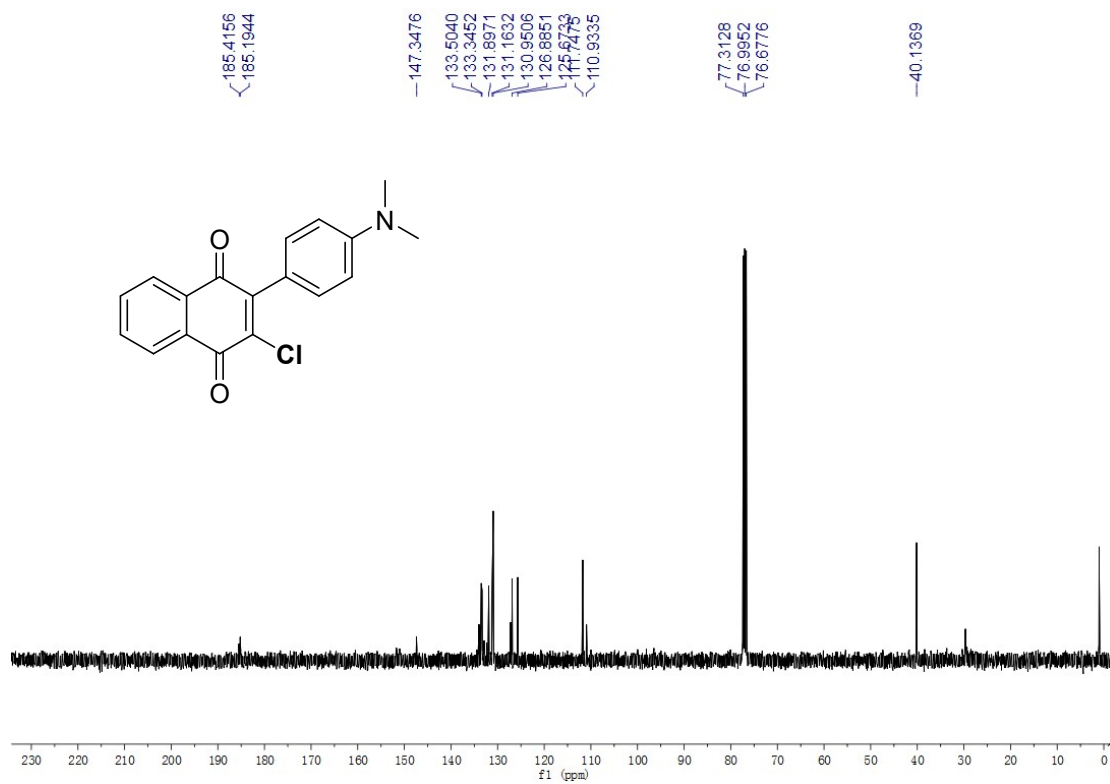

## 2-(4-(dimethylamino)phenyl)anthracene-1,4-dione (3s)

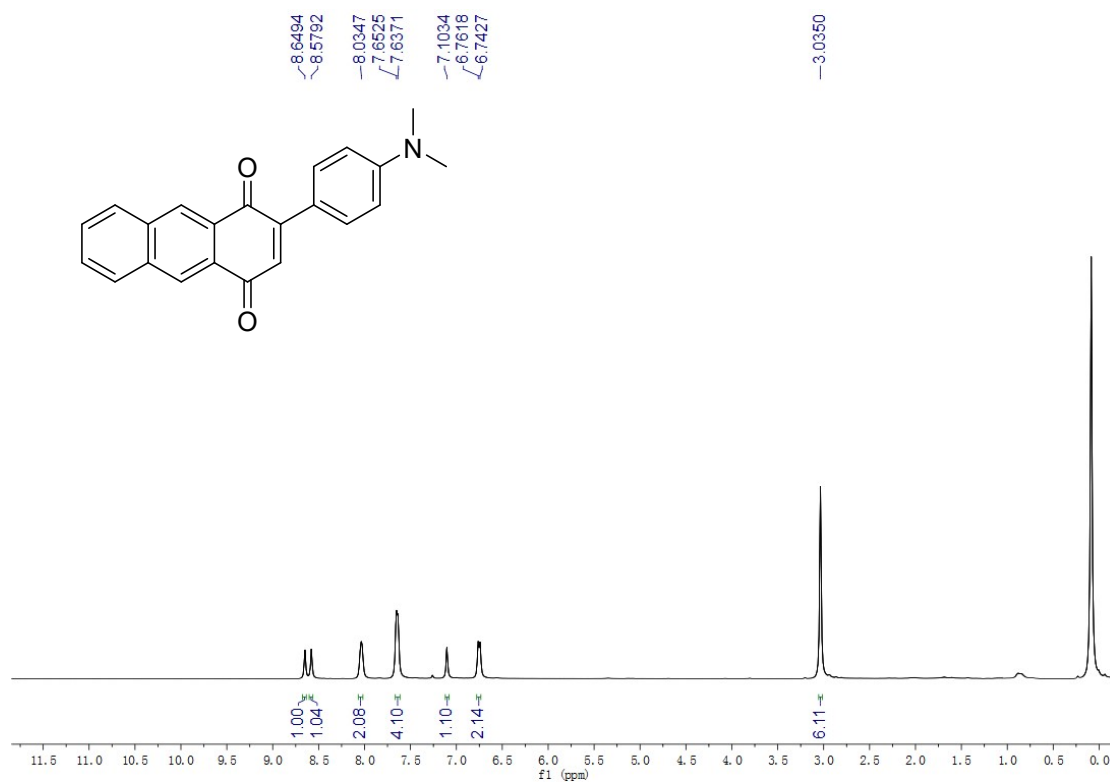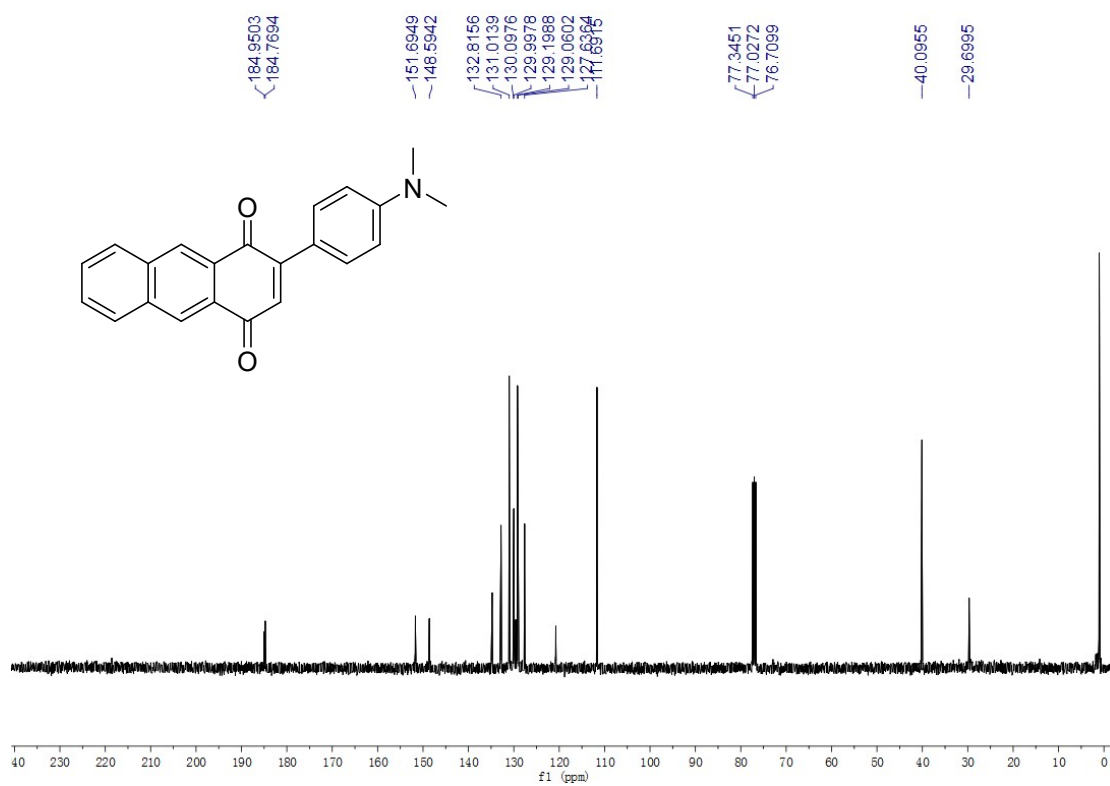

Supplement: d1ra08828a1.pdf [file d1ra08828a1.pdf]
